# Supplementary material for: Performance of snow density measurement systems insnow stratigraphies
Source: Copernicus journal article supplement (doi:10.5194/gi-2020-14), 2020-06-02
Supplement: Supplementary file [file gi-2020-14-AC4-supplement.zip]

# Performance of snow density measurement systems in snow stratigraphies

Jiansheng Hao<sup>1,2,3,4</sup>, Farong Huang<sup>1,2,3,4,5</sup>, Ditao Chen<sup>1,2,3</sup>, Shuyong Mu<sup>6</sup>, Lanhai Li<sup>1,2,3,4,5</sup>

<sup>1</sup>State Key Laboratory of Desert and Oasis Ecology, Xinjiang Institute of Ecology and Geography, Chinese Academy of Sciences, Urumqi 830011, China

<sup>2</sup>Ili Station for Watershed Ecosystem Research, Chinese Academy of Sciences, Xinyuan 835800, China

<sup>3</sup>University of Chinese Academy of Sciences, Beijing 100049, China

<sup>4</sup>CAS Research Center for Ecology and Environment of Central Asia, Urumqi 830011, Xinjiang, China

<sup>5</sup>Xinjiang Key Laboratory of Water Cycle and Utilization in Arid Zone, Urumqi 830011, Xinjiang, China

<sup>6</sup>Xinjiang Regional Center of Resources and Environmental Science Instrument, Chinese Academy of Sciences, Urumqi 830011, China

Correspondence to: Lanhai Li (lilh@ms.xjb.ac.cn)

**Abstract.** Gravimetric and dielectric permittivity measuring systems are applied to measure snow

density, but few studies have addressed differences between ~~the~~ two measurement systems under complex snowpack conditions. A field experiment was conducted to measure snow density using the two measurement systems in different stratigraphical layers consisting of fragmented precipitation particles (DF), faceted crystals particles (FC), depth hoar (DH) and melt forms (MF), and the performance of measurement systems was analyzed and compared. The results showed that the measured density from dielectric permittivity measurement system overestimated dry snow densities and underestimated wet snow densities with respect to the densities from gravimetric measurement system. Compared with the gravimetric measurement system, the dielectric permittivity measurement system has relatively low precision and accuracy in the DF, FC and DH layers, and presents a similar precision and accuracy in the MF layer with high liquid water content.~~The results showed that the measured density from the gravimetric measurement system was significantly higher than that from the dielectric permittivity measurement system. The precision and accuracy of the gravimetric measurement system were higher than that of the dielectric permittivity measurement system in the DF, FC and DH layers, but the precision and accuracy of two measurement systems were similar in the MF layers.~~ By comparing the precision and accuracy as well as merits and drawbacks of the two measurement systems, it was concluded that using gravimetric measurement system during dry snow period and dielectric permittivity measurement system during wet snow period will help surveyors obtain more reliable data. Furthermore, the study provided an approach which will facilitate the integration of the data obtained from different studies with different measurement systems into global

databases.

## 35 1 Introduction

Snow cover is a critical component linking the global climate system and the earth surface system, and provides water resources to large populations worldwide (Huning and AghaKouchak, 2018; Skiles et al., 2018; Barnett et al., 2005; Sturm et al., 2002). Density is one of the fundamental and important snow properties, which varies over time (Carrol, 1977; Conger and McClung, 2009; De Michele et al., 40 2013). It plays a key role in shaping a wide range of snow properties and physical processes.-(Bormann et al., 2013). Snow mechanical parameters are determined and estimated based on its density (Jamieson and Johnston, 2001; Abe, et al., 2006; Wang and Baker, 2013; Hannula et al., 2016). Permeability, photochemistry and thermal conductivity are linked to density and depend on vertical density variations (Sturm et al., 1997; Calonne et al., 2011, 2012). Snow density is also an indispensable input parameter 45 for snow dynamic models such as SNOWPACK (Lehning et al., 2002) and CROCUS (Brun et al., 1989). Snow density has many applications in hydrological cycle studies (Sturm et al., 2010), water resources management (Barnett et al., 2005; Huning and AghaKouchak, 2018; Jonas et al., 2009), ecosystem studies (Rixen et al., 2008), climatology studies (Okuyama et al., 2003) and avalanche forecasts (Schweizer and Jamieson, 2001). It is therefore essential to determine snow density for 50 cryospheric and hydrological studies. A precise and standardized measurement of snow density is of major importance to better understand snow dynamics. However, separate studies with similar aims often used different measurement systems to obtain snow density, and snow density data from different measurement systems in the same snowpack was significantly different (Hawley et al., 2008; Conger and McClung, 2009; Proksch et al., 2016). It is difficult to integrate snow density data from different 55 studies with different measurement systems into global databases due to lack of quality control and assimilation of snow density from different measurement systems (Bormann et al., 2013). ~~—Therefore, difficulties exist for using snow density data from separate studies obtained by different measurement systems in international research and to be integrated into global databases. Quality evaluation and assimilation of snow density data obtained by different measurement systems are a necessary step 60 before the integration of the data obtained from separate studies with different measurement systems into global databases, but few studies have addressed assimilation of snow density data from different measurement systems.~~

Snow density has been measured in the field and laboratories using various measurement systems.

These measurement systems include gravimetric measurement system (GMS), dielectric permittivity measurement system (DMS), the neutron-scattering probe (NSP), micro-computed tomography (MCT) and diffuse near-infrared transmission (DNT)~~the neutron scattering probe, micro-computed tomography and diffuse near infrared transmission~~ (Hawley et al., 2008; Conger and McClung, 2009; Proksch et al., 2016; Gergely et al., 2010). In the field, snow density data are normally measured by technical staff, and measurements are made at flat study plots (Schweizer and Jamieson, 2001; Conger and McClung, 2009, Proksch et al., 2016). Taking the cost of measuring equipment, the technical simplicity and the efficiency of observation into consideration, gravimetric measurement system and dielectric permittivity measurement system are often applied to the measurement of snow density in the field (Hawley et al. et al. 2008; Conger and McClung, 2009; Wilhelms, 2005; Kinar and Pomeroy, 2015). Gravimetric measurement system consists of two parts: high precision electronic balance and different style cutters with a given volume. To determine snow density, a core sample of snow is extracted from the snow profile using a snow sampler. The density of the sampled snow is determined by weighted snow mass divided by the cutter's volume with a unit of  $\text{kg m}^{-3}$ . DMS is based on the principle of measuring the response characteristics (travel time, reflection, attenuation) of an electromagnetic signal through snow (Frolov and Macheret, 1999). The ratio of water, air, and ice in snow determines the dielectric permittivity of snow (Tiuri and Sihvola, 1984; Schneebeli et al., 1998). Snow density is calculated using the electrical properties of ice, water, and air measured by DMS (Tiuri et al., 1984; Kovacs et al., 1995). ~~Dielectric permittivity measurement system can measure the real and imaginary permittivity and attenuation of snow to determine snow density. The "Finnish Snow Fork" has been widely used for these measurement (Sihvola and Tiuri, 1986; Sugiyama et al. et al., 2010; Harper and Bradford, 2003; Techel and Pielmeier, 2011).~~ Carroll (1977) reported that there was no significant difference between  $200\text{cm}^3$  and  $100\text{cm}^3$  box-type cutters and  $500\text{cm}^3$  tube-type cutters for snow density measurement, and that inexperienced operators tended to overestimate the densities found by more experienced workers, which was attributed to snow grain type and associated measurement difficulties. Hawley et al. (2008) evaluated the accuracy of GMS, DMS and NSP. DMS underestimated snow densities in lower-density snow but agreed with the GMS for higher-density snow.~~Hawley et al. (2008) evaluated the accuracy of gravimetric measurement system, dielectric permittivity measurement system and the neutron scattering probe. Dielectric permittivity measurement system underestimated snow densities in lower density snow but agreed with the gravimetric~~

~~measurement system for higher density snow (Hawley et al., 2008).~~ Conger and McClung (2009)

95 compared box-, wedge-, and cylinder-type density cutters and reported that there was a variation of 3–12% between the three cutter types. Proksch et al. (2016) compared the measurement results from

GMS and MCT, and found snow densities measured by two measurement systems agreed within 9%.

Leppänen et al. (2016) reported that the snow density from DMS was lower than that from GMS.

Recently, López-Moreno et al (2020) reported that notable differences were observed among the

100 different GMS and suggested that it is necessary to understand the natural variability of snow

characteristics and the instrumental and observer induced error before snow density measurement.

~~Recently, Proksch et al. (2016) compared the density cutters to micro-computed tomography and found snow densities measured by different measurement systems agreed within 9%. Leppänen et al. (2016)~~

~~reported that the snow density from the Snow Fork was lower than that from the gravimetric~~

105 ~~measurement system.~~ These previous studies focused on evaluating and comparing the accuracy of

different measurement systems in same snowpack condition and analyzing the influence of measuring

instrument errors and personnel errors on measurement accuracy. ~~The existing literature also reported~~

~~that snow properties have a significant influence on the accuracy and precision of density measurement systems.~~ However, relatively few studies have conducted to explicitly evaluate and compare the

110 accuracy of different systems under different snowpack conditions.

Snow crystals undergo ~~different low, high and isothermal temperature~~ gradient metamorphism growth over time and exhibit different characteristics (Fierz et al. 2009). Having undergone different

meteorological conditions, the structure in each layer evolves differently from adjoining layers in terms of grain shape, grain size, inter-granular bonding, density, hardness, wetness and so on. Therefore,

115 snowpack is made up of many snow layers with different physical properties, and snow stratigraphy is constantly changing during a snow cover period. This is especially true in thick snowpack, where

stratification boundaries of the snowpack are obvious, and the characteristics of adjacent snow layers are significantly different (Harper and Bradford, 2003). The change of snow stratigraphy with different

physical properties may influence the accuracy and precision of density measurement system used.

120 ~~Snow properties have a significant influence on the accuracy and precision of density measurement system. Therefore, density measurement system shows different accuracy and precision with the~~

~~change of snow stratigraphy with different physical properties.~~ Selection of measurement systems

based on the performance of different measurement systems in various snow stratigraphies will help to

obtain more reliable data and optimize field measurements. However, the performance of different measurement systems in different snow stratigraphies is poorly understood. Although the existing literature provides an overview of the merits and drawbacks of different measurement systems, tangible guidance on how to make decisions based on measurement system selection in various snow stratigraphies for users is also not clearly provided.

To better understand the performance of different measurement systems under the conditions with various snow stratigraphies, snow-pit measurements were carried out at the Tianshan Station for Snow cover and Avalanche Research (TSSAR) in the winter of 2017/2018.~~To better understand the performance of different measurement systems in various snow stratigraphies, snow-pit measurements were carried out at the Tianshan Station for Snowcover and Avalanche Research (TSSAR) in the winter of 2017/2018.~~

Gravimetric measurement system and dielectric permittivity measurement system were applied to measure snow density in various snow stratigraphies. The objectives of this study are to assess (1) whether the same measurement system showed similar performance in different snow stratigraphies, and whether the two measurement systems provided similar results in the same snow stratigraphy; and (2) whether assimilation of the density data obtained by different measurement systems is feasible. Precision and accuracy as well as merits and drawbacks of the two measurement systems in terms of applicability (time and labour needed) were discussed, and recommendations in terms of practicality for field measurement were derived. The result will help field operators to choose more effective and reasonable measurement system based on snowpack characteristics in the field. Meanwhile, assimilation of density data obtained by different measurement systems will allow the data from different measurement systems to be more widely used in international research and contribute to global snowpack databases.

## **2 Data and Methods**

### **2.1 Measurement systems of snow density**

~~The following section gives an overview of the instruments and methods which were used to measure snow density in TSSAR during the winter of 2017/2018.~~

This study used GMS and DMS to measure the snow density in TSSAR during the winter of 2017/2018. Gravimetric methods measurement system has the longest history and has proven utility. ~~It consists of two parts: high precision electronic balance and different styles cutters. The 100 cm<sup>3</sup> box-cutter with 6cm×5.5cm×3cm was used in this study (Fig. 1a).~~ GMS with the 100 cm<sup>3</sup> box-cutter

with 6cm×5.5cm×3cm was used in this study (Fig. 1a). –which is based on a design originated by the

Institute of Low Temperature Science, Japan. The box sampler is a rectangular frame open at both ends. It has a handle on one end. The digital electronic weighing scale (from <http://snowmetrics.com/shop/prosnow-kit-i/>) is plastic, portable and waterproof and measures up to 1000 g at a 0.1g resolution with accuracy of  $\pm 0.01\text{g}$ , under an operating environment of  $-25^{\circ}\text{C}$  to  $+40^{\circ}\text{C}$ . The researchers used a snow shovel to dig a snow pit from the snow surface to ground level and used a snow saw to obtain a profile of snowpack in the observation field. The weighing scale was then placed on a flat surface and zeroed. The cutter pushed horizontally into the target layer being measured to collect the sample, and all snow was cleaned from the outside of the sampler. The snow sample was extracted and put in a plastic bag, and then put the sample on the weighing scale and recorded weight data.

DMS with the Snow Fork was used in this study (Fig. 1b), and has already been used in many studies (Tiuri and Sihvola, 1986; Harper and Bradford, 2003; Sugiyama et al., 2010; Techel and Pielmeier, 2011). The Snow Fork is designed for measuring the properties of snow in the field (Fig. 1b) (Sihvola and Tiuri, 1986; Toikka, 2009). It is light, quick, and simple to operate. It has already been used in many studies and have shown good results (Tiuri and Sihvola, 1986; Harper and Bradford, 2003; Sugiyama et al., 2010; Techel and Pielmeier, 2011). The Snow Fork is designed to operate in extreme conditions with temperatures low to  $-25^{\circ}\text{C}$  (Toikka, 2009). The Snow Fork is a portable instrument, consisting of an electronics box, a sensor, a keyboard and rechargeable batteries. It probes samples of snow within a cylindrical volume of about  $2 \times 7.5\text{ cm}$  and operates between 500 and 1000 MHz. The sensor of the Snow Fork is a steel fork used as a microwave resonator. Resonant frequency, attenuation, and 3-dB bandwidth are measured by the Snow Fork, and the results are used to accurately calculate snow density ( $\rho$ ) and liquid water content (LWC). ~~Resonant frequency, attenuation, and 3-dB bandwidth are measured by the Snow Fork, and the results are used to accurately calculate snow density and liquid water content.~~ The details of instrument operation can be found at <https://toikkaoy.com/>.

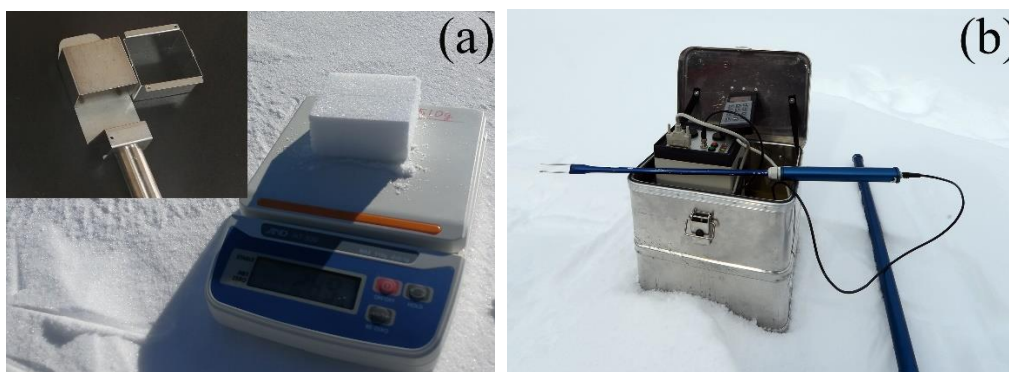

**Figure 1.** Snow density measurement systems: (a) gravimetric measurement system (the 100 cm<sup>3</sup> box-cutter and the weighing scale), (b) dielectric permittivity measurement system (the Snow Fork).

## 2.2 Stratigraphy and mechanical properties of snow

Snowpack is made up of many snow layers with different physical properties, and the stratification boundaries of snowpack are obvious. A stratigraphic layer is a certain stratum with similar properties (size of the grains, microstructure, shear strength, hardness) in the snowpack according to Fierz et al. (2009). An overview of the methods which were used to measure these snow properties is described as follows in the following section.

Snow depth was the measurement of the vertical length of snow from ground to snow surface. The ground was taken as reference datum recorded as 0 cm, and the vertical length from the ground to the snow surface was recorded as the snow depth. Snow rulers were used to measure snow depth. We used a brush to gently remove snow from the profiles, then examined the snow crystal diameter with the aid of snow crystal screen which has two grids of 1 and 2mm under an 8 or 10×magnifier.

Shear strength is one of the fundamental mechanical properties of snow, which is the strength of snow against ~~the type of~~ yield (Mellor, 1975; Nakamura et al., 2010). The shear strength of snow is determined by microstructure and reflects the bond strength between the snow particles. The shear frame system is usually used to measure the shear strength of snow (Mellor, 1975; Nakamura et al., 2010). The measurement system consists of two parts: a shear frame with area of 0.025 m<sup>2</sup> and the attached force gauges with full load capacity of 100 N (Fig. 2a) (Jamieson and Johnston, 2001, 2007; Abe et al., 2006). Overlying snow was removed, leaving about 40mm of undisturbed snow above the measured snow layer. The shear frame was inserted onto the measured snow layer and manually pulled



smoothly and quickly to ensure fracturing of measured snow layer. The shear strength is obtained by dividing the force gauges data by effective shear area. In this study, the shear strength of the measured layer was estimated by the shear strength from twelve shear measurements (Jamieson and Johnston, 2001, 2007; Abe et al., 2006; Nakamura et al., 2010).

Snow hardness indicates an ability of resistance to penetration or the pressure required for penetration of snow (Pielmeier and Schneebeli, 2003). The higher the hardness, the smaller the compressibility. Snow hardness was measured with the push-pull gauge with full load capacity of 100 N at observation sites (Fig. 2b). The attachment of the push-pull gauge was penetrated horizontally into the snow profile at a uniform speed. When snow was completely covered with the attachment, the dial readings were recorded. The snow hardness value  $PR_{15}$  is the recorded data divided by the area of the attachment, and the unit of  $PR_{15}$  is Kpa. In this study, the hardness of the measured layer was estimated by the hardness from twelve hardness measurements (Takeuchi et al., 1998).

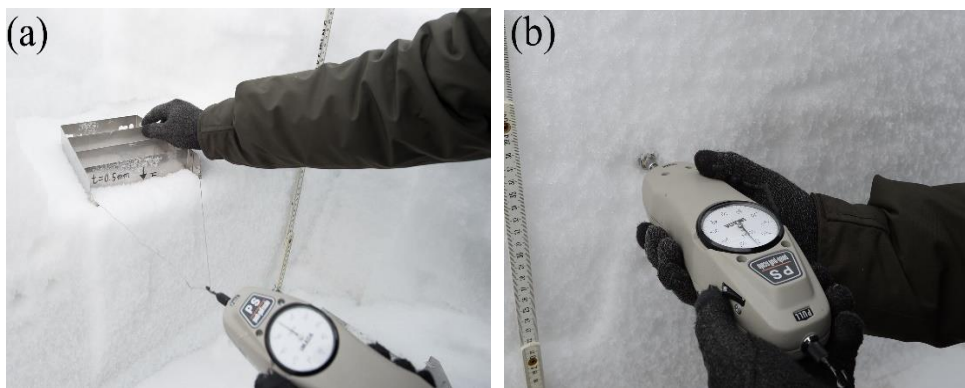

**Figure 2.** The measurements of snow mechanical properties: (a) snow shear strength measurement (b) snow hardness measurement.

### 2.3 Field experiment design

To ~~understand~~ investigate the performance of different measurement systems in different snow stratigraphies, snow density data measured on different snow stratigraphical profiles by different measurement systems were collected. Data for analysis were collected in the observation field of the TSSAR. Built in 1967, the TSSAR (43°16' N, 84°24' E) with an elevation of 1776m above sea level is located in the upstream branch of the Kunes River in the mid-mountain zone of the western Tianshan Mountains, ~~China~~. Geomorphological setting and the climate of TSSAR were described by others in published literature (Ma et al., 1990; Lu et al., 2016; Hao et al., 2018). ~~Based on observations at the TSSAR, the mean annual temperature is approximately 1.4°C, and monthly minimum (January) and~~



maximum (July) average temperatures are  $-17.7^{\circ}\text{C}$  and  $15.0^{\circ}\text{C}$ , respectively (Lu et al., 2016). Average annual precipitation is 870 mm and snowfall in the cold season accounts for more than 30% of annual precipitation. Average snow depth in the station is 78cm with a maximum snow depth of approximately 160cm in the cold season from 2000 to 2001. TSSAR has a continental snow climate with snow water equivalent of less than 1000mm and average temperature of less than  $-7^{\circ}\text{C}$  (Hao et al., 2018). The snowpack is characterized by lower snow density, lower snow shear strength and high proportion depth hoar. High proportion depth hoar is considered to be the main cause of frequent avalanches release in this area (Ma et al., 1990; Hao et al., 2018).

In order to obtain snow density data within various stratigraphies, the experiment was carried out during different periods when the snow stratigraphy was significantly different. Based on the liquid water content in snow, snow was divided into two types: wet snow and dry snow. Wet snow was defined as snow with volumetric liquid water content greater than 3%, which was characterized by the fact that water can be recognized at  $10\times$  magnification by its meniscus between the grains (Fierz et al., 2009). Wet snow indicates that water will likely percolate through the snow since the transition from the pendular to the funicular regime starts at a liquid water content of 3% (Denoth, 1980; Techel and Pielmeier, 2012). If the volumetric liquid water content in snow is less than 3%, snow is defined as dry snow. The experiment was first conducted on January 20<sup>th</sup>-21<sup>st</sup>, 2018, with the average air temperature of  $-7.6^{\circ}\text{C}$ , which represents a period of dry snowpack conditions. The depth of the snowpack was 55cm with the liquid water content ranging from 0 to 0.45% due to solar radiation reaching on the surface of the snowpack. The snowpack crystals consisted of decomposing and fragmented precipitation particles (DF) with 25%, faceted crystals (FC) particles with 33% and depth hoar (DH) particles with 42%. According to Fierz et al. (2009) and Techel and Pielmeier (2011), there were more high temperature gradient metamorphism grains (snow class FC, DH) than low temperature gradient metamorphism grains (snow class DF) in the snowpack. The experiment was performed again on March 10<sup>th</sup>, 2018, with the average air temperature of  $-0.7^{\circ}\text{C}$ , which represents a period of wet snowpack conditions. The depth and liquid water content of snowpack were 42cm and 3.0~6.0%, respectively, and the snowpack crystals consisted of DH with 8% and MF with 92%. Before implementing each density measurement experiment, a rectangular snow-pit was excavated in a previously undisturbed location and all measurements were made on a shaded side-wall of the snow-pit. The same experienced individuals took all samples and measurements.

~~An experiment was designed to obtain profile density data measured at various snow stratigraphies by different measurement systems. In order to obtain snow density data within various stratigraphies, the experiment was carried out during different periods when the snow stratigraphy was significantly different. The experiment was first conducted on January 20<sup>th</sup>-21<sup>st</sup>, 2018, which represents a period of dry snowpack conditions. The depth and liquid water content of the snowpack were 55cm and 0~0.45% with the air temperature of -7.6°C on the day, and the snowpack crystals consisted of decomposing and fragmented precipitation particles (DF) with 25%, faceted crystals (FC) particles with 33% and depth hoar (DH) particles with 42%. According to Fierz et al., (2009), and Techel and Pielmeier (2011), there were more high temperature gradient metamorphism grains (snow class FC, DH) than low temperature gradient metamorphism grains (snow class DF) in this snowpack. The experiment was performed again on March 10<sup>th</sup>, 2018, which represents a period of wet snowpack conditions. The depth and liquid water content of snowpack were 42cm and 3.0~6.0% with the air temperature of -0.7°C on that day, and the snowpack crystals consisted of depth hoar (DH) with 8% and melt forms (MF) with 92%. The experimental method is described in the following section. Before implementing each density measurement experiment, a rectangular snow pit was excavated in a previously undisturbed location and all measurements were made on a shaded side wall of the snow pit. The same experienced individuals took all samples and measurements.~~

**Measurements in dry and wet snowpack:** To compare the performance of different measurement systems in the same snowpack, whole dry snow layer density data by different measurement systems was collected on January 20<sup>th</sup>, 2018. The sampling was performed from the snow surface to ground at intervals of 30 mm and snow density was measured (Fig. 3a). The average density value of eighteen snow blocks from the snow surface to ground was calculated as the density of whole snow layer. The middle position of cutter snow sampling corresponded to the points of the Snow Fork measurement in order to compare the density from the two measurement systems at the same level (Fig.3). After one measurement of density within a whole snow layer, the observation position moved horizontally to next one. The density measurement of the whole snow layer was repeated with 20 times. Density data of whole wet snow layer by different measurement systems were collected on 10 March 2018. The same experimental method for measuring whole dry snow layer density was used to measurement the whole wet snow layer density. The average value of 14 snow blocks density from the snow surface to ground

was calculated as the density of whole wet snow layer.

**Measurements within various snow stratigraphies:** to understand the performance of the same measurement system in different snow stratigraphies and compare the performance of different measurement systems in various snow stratigraphies, the density data measured on the different dry snow stratigraphical profiles by different measurement systems were collected on 21 January 2018. The shape and size of grain, and the depth of snow layers were first measured. After the stratigraphic arrangement of the snowpack was identified (Table 1), the middle position of the given snow layer was considered to be the target location of the measured density (Fig. 3b). Density measurements were made in the DF, FC and DH snow layers by the two measurement systems and repeated with 25 times. Shear strength and hardness of each layer were measured separately after the density measurements were completed. Similarly, density, shear strength and hardness of the MF snow layer were measured on 10 March 2018.

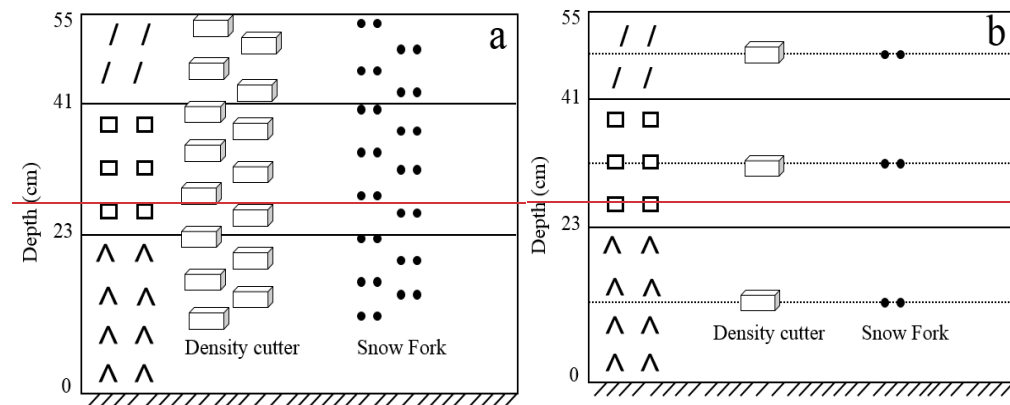

**Figure 3.** Schematic diagram showing the Snow Fork and the box-type cutter density measurements. (a) Density measurement of the whole snow layer from the snow surface to ground. Intervals of the measurements in the vertical direction are 30 mm. (b) Density measurement of snow layer made up of the same type of grain. The slashes, hollow block and triangular brackets represent DF, FC and DH.

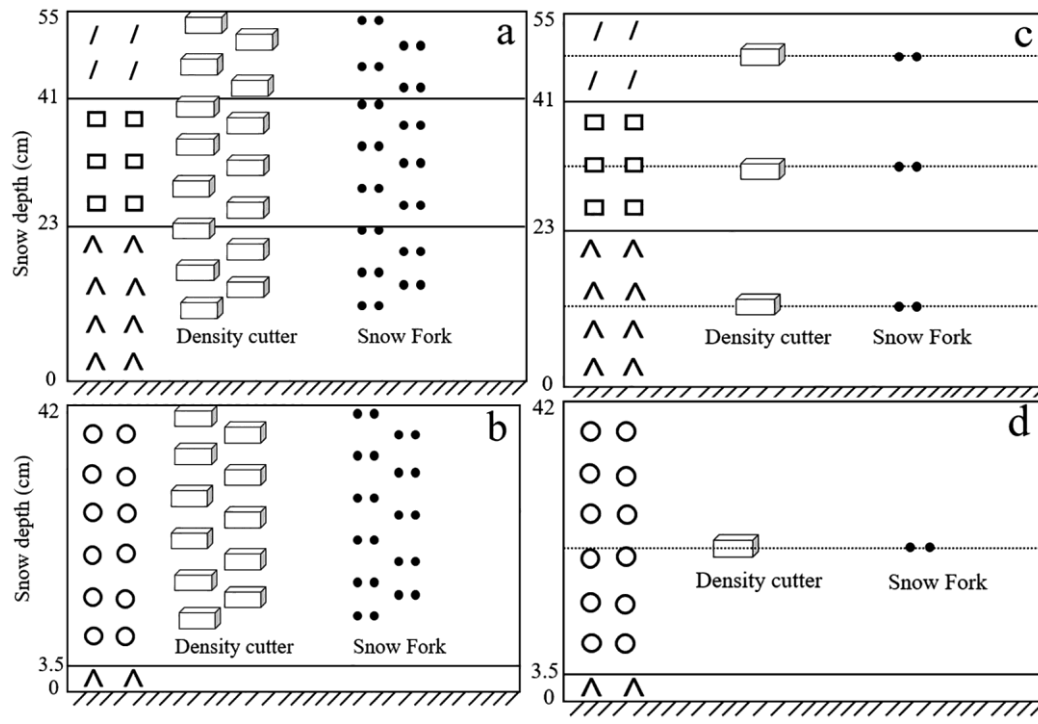

**Figure 3.** Schematic diagram showing the gravimetric measurement system (box-cutter) and dielectric permittivity measurement system (Snow Fork) density measurements. (a) and (b): density measurement of the whole snow layer from the snow surface to ground. Intervals of the measurements in the vertical direction are 30 mm. (c) and (d): density measurement of snow layer made up of the same type of grain. The slashes, hollow block triangular brackets and hollow circle represent DF, FC, DH and MF.

**Table 1.** Summary of sample layer characteristics and measurements.

| Snow layer | Grain shape | Layer thickness<br>(cm) | Size of grain<br>(mm) | Liquid water<br>content (%) | Data            | Number of<br>samples |
|------------|-------------|-------------------------|-----------------------|-----------------------------|-----------------|----------------------|
| 1          | DF          | 14                      | 0.2~1                 | 0~0.4%                      | 21 January 2018 | 25                   |
| 2          | FC          | 18                      | 1~2                   | 0                           | 21 January 2018 | 25                   |
| 3          | DH          | 23                      | 2~4                   | 0                           | 21 January 2018 | 25                   |
| 4          | MF          | 38                      | 1~3                   | 3.0%~4.5%                   | 10 March 2018   | 25                   |

## 2.4 Data analyses

To understand and compare the performance of different measurement systems in various snow stratigraphies, the accuracy and precision of the measurement system using density measurement data were evaluated. The accuracy of a measurement system is the degree of closeness of measurements of a

quantity to that quantity's true value (ISO, 1994). The average density from GMS was defined as the reference true value in this study and was formulated by equation (1). In this study, the average value of all samples in the same conditions was considered to the true value and was formulated by equation (1).

Relative error (RE) and average relative error (ARE) were used to assess the accuracy of measurement system and formulated by equation (2) and (3).

$$\bar{x} = \frac{1}{n} \sum_{i=1}^n x_i \quad (1)$$

$$RE = \frac{x_i - \bar{x}}{\bar{x}} \times 100\% \quad (2)$$

$$ARE = \frac{|RE|}{n} \quad (3)$$

Where  $\bar{x}$  denotes the average of all samples,  $x_i$  is the density of the  $i^{th}$  sample,  $n$  is the total number of samples. The precision of a measurement system, related to reproducibility and repeatability, is the degree to which repeated measurements under unchanged conditions show the same results. Relative standard deviation (RSD) was used to assess the precision of each measurement system and formulated by equation (4). The smaller RSD, the higher the precision of a measurement system.

$$RSD = \frac{1}{\bar{x}} \sqrt{\frac{\sum_{i=1}^n (x_i - \bar{x})^2}{(n-1)}} \times 100\% \quad (4)$$

Measurement uncertainty was a parameter characterizing the dispersion of the values attributed to a measured quantity. The higher the uncertainty, the lower the credibility and application value of data (BIPM et al., 2008). In this study, to evaluate measure uncertainty, the uncertainty ( $\mu_A$ ) was calculated according to the following formula (Elster, 2007; BIPM et al, 2008):

$$\mu_A = \sqrt{\frac{\sum_{i=1}^n (x_i - \bar{x})^2}{n(n-1)}} \quad (5)$$

All statistical computations were implemented with statistical software (IBM SPSS Statistics 21). RE, ARE, RSD and  $\mu_A$  were calculated for accuracy and precision of different measurement systems. The Levene's test was performed to verify departures from basic assumptions of variance and normality. A 1-way ANOVA was conducted to assess the overall statistical significance of differences among the measure groups ( $\alpha=0.05$ ).

### 3 Results

#### 3.1 Density measurements by gravimetric measurement system (GMS) in various snow stratigraphies

The profiles of dry snow density obtained from GMS are shown in Fig. 4(a). The density of DH layer (0-23cm) was greater than that of DF and FC layers (23-55cm) (Fig. 4(a)). For 23-55cm snow layers, the density of the ice layer (40-41cm) between DF and FC layers was higher than that in other parts of the snow profile. The density of newly formed DH layer (21-23cm) was much lower than that of other parts of snow in the DH layer. The wet snow density profiles of GMS are shown in Fig 4(b). The density of snow from the 12cm to 18cm layer with liquid water content of 5%-6% was higher than that from other layers. The results of measurement error and uncertainty in Table 2 suggested that ARE and RSD of dry snow from GMS were higher than that of wet snow, which indicated that GMS has more accurate and precision in dry snow than that in wet snow.

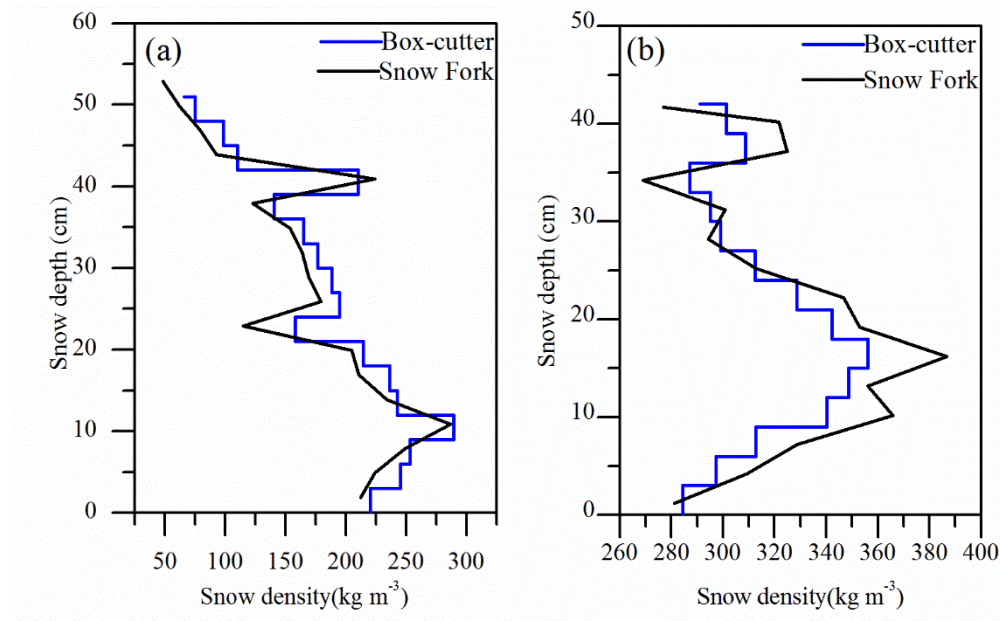

**Figure 4.** Density profile measured by gravimetric measurement system (box-cutter) and dielectric permittivity measurement system (Snow Fork): (a) dry snow density data; (b) wet snow density data.

**Table 2.** Result summary of experimental measurement using GMS (box-cutter) in field. RE, relative error; ARE, average relative error; RSD, relative standard deviation;  $\mu_A$ , the uncertainty.

| Measurement system | Snow type | Layer mean density (kg/m <sup>3</sup> ) | RE (%) | ARE (%) | RSD (%) | $\mu_A$ (kg/m <sup>3</sup> ) |
|--------------------|-----------|-----------------------------------------|--------|---------|---------|------------------------------|
|                    | Dry snow  | 187.3                                   | -6~8   | 3.1     | 3.6     | 1.5                          |

|             |          |       |       |     |     |     |
|-------------|----------|-------|-------|-----|-----|-----|
| Gravimetric | Wet snow | 311.5 | -4~5  | 2.3 | 2.7 | 1.9 |
| measurement | DF       | 93.5  | -8~10 | 4.2 | 4.9 | 0.9 |
| system      | FC       | 177.3 | -4~6  | 2.9 | 3.4 | 1.2 |
|             | DH       | 236.8 | -4~3  | 2.1 | 3.2 | 1.6 |
|             | MF       | 304.9 | -6~7  | 2.8 | 3.3 | 2.0 |

The density measured by GMS in Table 2 suggested that ARE and RSD of measured density in different snow stratigraphies were significantly different ( $P<0.05$ ). GMS showed the highest accuracy in the DH, with a RE of -4%~3 %, and an ARE of 2.1%. ARE of measured density in DF layer were 4.2%, which was 2 times higher than that in DH layer. The order of RSD and ARE were as follows:  $DF > FC > MF > DH$ , which indicated that the accuracy and precision of GMS using the box-cutter were found to be:  $DF < FC < MF < DH$ .

### **3.2 Density measurements by dielectric permittivity measurement system (DMS) in various snow stratigraphies**

Fig. 4 showed that the profiles of snow density in same snowpack from DMS were similar to that from the GMS, but snow density measured was significantly different ( $P<0.05$ ). The mean density from DMS was 9% and -3% lower than that from GMS in dry and wet snowpack, expressed as percentage of the mean density from GMS. Table 3 showed that ARE and RSD of measured density of wet snow from DMS were lower than that of dry snow, which indicated that DMS was more accurate and precise in wet snow than that in dry snow. Compared with GMS, DMS had relatively higher ARE and RSD in the same snowpack (Table 2 and Table 3).

ARE and RSD of density measured by DMS were significantly different ( $P<0.05$ ) in different snow layers. For different snow layers, ARE of measured density in DF layer was 24.4%, which was about 7.6 times higher than that in MF layer. RSD of measured density in DF layer was 28.0%, which was 6.7 times higher than that in MF layer. The order of ARE and RSD of measured density was as follows:  $DF > FC > DH > MF$  (Table 3), which indicated that the accuracy and precision of DMS were as follows:  $DF < DH < FC < MF$  (Table 3). Compared with the density from GMS, the density from DMS was relatively high in DF, FC and DH layers (Table 2 and Table 3). In contrast, the density in MF layer from DMS was higher than that from GMS using the box-cutter. The snow density from GMS and DMS showed the largest difference in DF layer, and the smallest difference in MF layer. Compared with GMS, DMS had relatively poor accuracy and precision in all four snow layers.



**Table 3.** Result summary of experimental measurements using dielectric permittivity measurement system (the Snow Fork) in field. RE, relative error; ARE, average relative error; RSD, relative standard deviation;  $\mu_A$ , the uncertainty. RE, ARE and RSD are expressed in % of the mean density from box-cutter group.

| Measurement system                         | Snow type | Layer mean density (kg/m <sup>3</sup> ) | RE (%)   | ARE (%) | RSD (%) | $\mu_A$ (kg/m <sup>3</sup> ) |
|--------------------------------------------|-----------|-----------------------------------------|----------|---------|---------|------------------------------|
| Dielectric permittivity measurement system | Dry snow  | 169.4                                   | -16~2    | 9.4     | 9.6     | 4.8                          |
|                                            | Wet snow  | 320.2                                   | -4.5~6.1 | 4.2     | 4.8     | 4.0                          |
|                                            | DF        | 68.7                                    | -49~-4   | 24.4    | 28.0    | 5.6                          |
|                                            | FC        | 168.3                                   | -16~5    | 5.5     | 7.0     | 2.6                          |
|                                            | DH        | 224.3                                   | -8~3     | 4.3     | 6.5     | 3.2                          |
|                                            | MF        | 311.3                                   | -8~9     | 3.2     | 4.2     | 2.6                          |

### 3.1 Density measure of the whole snow layer

The profiles of dry snow density obtained from two measurement systems are shown in Fig. 4(a).

The density of DH snow layer (0-23cm) was greater than that of DF and FC snow layers (23-55cm) (Fig. 4(a)). For 23-55cm snow layers, the density of the ice layer (40-41cm) between DF and FC was higher than that in other parts of the snow profile. The density of newly formed depth hoar layer (21-23cm) was much lower than that of other parts of snow in the depth hoar layer. Significant differences were found in the dry snowpack density of the box cutter and the Snow Fork group ( $P<0.01$ ), and Table 2 showed that the average density of the whole dry snowpack was 187.3 kg m<sup>-3</sup> calculated from the box cutter method and 169.4 kg m<sup>-3</sup> from the Snow Fork method. In other words, whole dry snowpack average density of the box cutter group was 1.1 times that of the Snow Fork group. Statistically significant differences ( $P<0.05$ ) were found in the ARE and the RSD of the two groups' data (Table 2). The ARE and RSD of the box cutter group were lower than that of the Snow Fork group. Measurement uncertainty was 1.5 kg m<sup>-3</sup> calculated from the box cutter method and 4.6 kg m<sup>-3</sup> from the Snow Fork method in the dry snowpack.

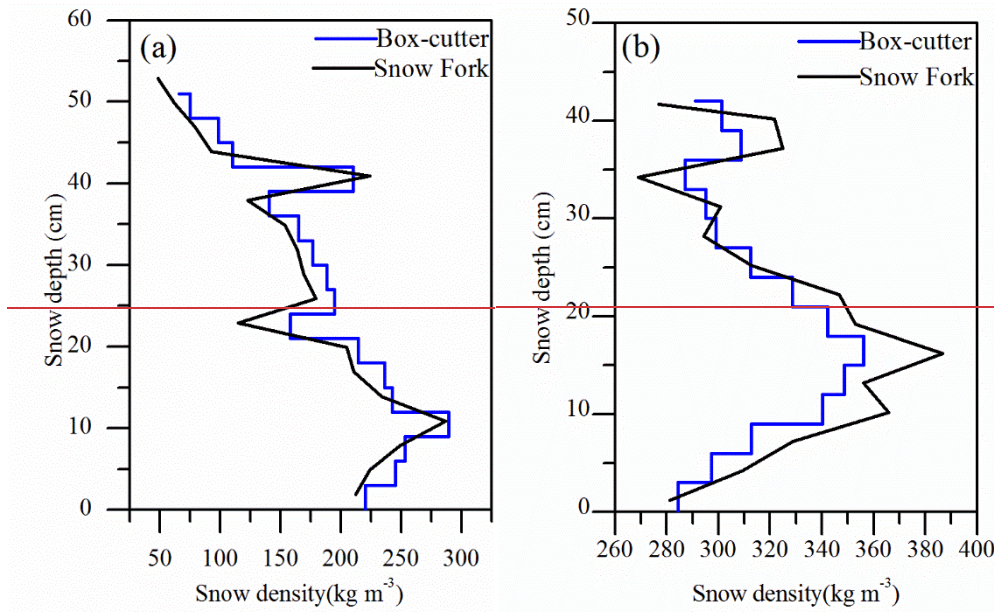

**Figure 4.** Density profile measured by different measurement system: (a) dry-snow density data; (b) wet-snow density data.

The wet-snow density profiles of the two measurement systems are shown in Fig. 4(b). The density of snow from the 12cm to 18cm layer with liquid water content of 5%–6% was higher than that from other layers. The density of snow from the box-cutter method was lower than that from the Snow Fork method in the 12–18cm snow layer. The wet-snow density of the box-cutter group was significantly higher than that of the Snow Fork group ( $P < 0.01$ ), and the whole wet-snowpack density of the Snow Fork group was 1.03 times that of the box-cutter group. The ARE and RSD of the two groups' data in wet-snowpack were statistically significantly different ( $P < 0.05$ ) (Table 2). Measurement uncertainty was calculated to be  $1.9 \text{ kg m}^{-3}$  from the box-cutter and  $3.3 \text{ kg m}^{-3}$  from the Snow Fork in the wet-snowpack. For both the dry and wet snowpack, the ARE, RSD, and measurement uncertainty of measured data from the box-cutter group were lower than that from the Snow Fork group.

**Table 2.** Result summary of experimental measurements in field for the whole snow layer\*

| Measurement-system | Snow-type | Layer-mean density<br>( $\text{kg m}^{-3}$ ) | RE<br>(%) | ARE<br>(%) | RSD<br>(%) | $\pm \mu_A$<br>( $\text{kg m}^{-3}$ ) |
|--------------------|-----------|----------------------------------------------|-----------|------------|------------|---------------------------------------|
| Box-cutter         | Dry-snow  | 187.3                                        | -6~8      | 3.1        | 3.6        | 1.5                                   |
|                    | Wet-snow  | 311.5                                        | -4~5      | 2.3        | 2.7        | 1.9                                   |
| Snow-Fork          | Dry-snow  | 169.4                                        | -10~9     | 4.6        | 5.6        | 4.6                                   |
|                    | Wet-snow  | 320.2                                        | -8~9      | 3.6        | 5.1        | 3.3                                   |

\* RE, relative error; ARE, average relative error; RSD, relative standard deviation;  $\mu_A$ , the uncertainty.

### 3.2 Density measurement of the different snow layers

The density of different snow layers was measured by the box cutter. The average density in DF, FC, DH and MF layers measured by box cutter was  $93.5 \text{ kg m}^{-3}$ ,  $177.3 \text{ kg m}^{-3}$ ,  $236.8 \text{ kg m}^{-3}$  and  $304.9 \text{ kg m}^{-3}$  (Table 3), respectively. The results of measurement error and measurement uncertainty in Table 3 suggested that the ARE and RSD of different snow stratigraphies measured data were significantly different ( $P < 0.05$ ) in the same box cutter. For different snow layers, the ARE of measured data was as follows:  $DF > FC > MF > DH$ . The ARE of DF layer measured were 4.2%, which was 2 times that of DH layer measured. The box cutter showed the highest accuracy in the DH, with a RE of  $4\% \sim 3\%$ , and an ARE of 2.0%. The order of RSD was as follows:  $DF > FC > MF > DH$ , and the RSD of DF measured was 1.5 times that of DH measured. The accuracy and precision of the box cutter were found to be:  $DF < FC < MF < DH$ .

The average density of DF, FC, DH and MF layers measured by the Snow Fork was  $68.7 \text{ kg m}^{-3}$ ,  $168.3 \text{ kg m}^{-3}$ ,  $224.3 \text{ kg m}^{-3}$  and  $311.3 \text{ kg m}^{-3}$ , respectively. The ARE and RSD of density measured by the same Snow Fork were significantly different ( $P < 0.05$ ) in different snow layers. For different snow layers, the ARE of measured was as follows:  $DF > FC > DH > MF$  (Table 3). The RE of the DF layer measured was  $18\% \sim 20\%$ , which was about 2 times that of MF layer measured. The ARE of DH, MF and FC layers measured was 4.1%, 2.9% and 3.4% respectively. The difference between the RSD measured from DH, MF and FC layers for the Snow Fork was significant ( $P < 0.05$ ). The RSD measured from DF layer was 18.9%, which was 4.9 times that of MF measured. The accuracy and precision of the Snow Fork were found to be:  $DF < DH < FC < MF$  (Table 3).

Table 3 showed that the density in the DF, FC and DH layers from the box cutter group were 1.36, 1.05 and 1.06 times that from the Snow Fork group, respectively. In contrast, the density in the MF layer from the Snow Fork group was higher than that from the box cutter group, and the density from the Snow Fork group was 1.02 times that from the box cutter group. The snow density from the box cutter and the Snow Fork showed the largest difference in DF layer, and the smallest difference in MF layer. The accuracy and precision of the box cutter measurement system were higher than that of the Snow Fork measuring system in all four snow layers.

**Table 3** Summary of measurement system error, deviation and the uncertainty in different snow layers<sup>a</sup>.

| Measurement system | Grain shape | Layer mean density<br>( $\text{kg/m}^3$ ) | RE<br>(%)     | ARE<br>(%) | RSD<br>(%) | $\pm_A$<br>( $\text{kg/m}^3$ ) |
|--------------------|-------------|-------------------------------------------|---------------|------------|------------|--------------------------------|
|                    | DF          | 93.5                                      | $-8 \sim -10$ | 4.2        | 4.9        | 0.9                            |

|            |    |       |        |      |      |     |
|------------|----|-------|--------|------|------|-----|
| Box-cutter | FC | 177.3 | -4~6   | 2.9  | 3.4  | 1.2 |
|            | DH | 236.8 | -4~3   | 2.1  | 3.2  | 1.6 |
|            | MF | 304.9 | -6~7   | 2.8  | 3.3  | 2.0 |
| Snow-Fork  | DF | 68.7  | -18~20 | 14.7 | 18.9 | 2.6 |
|            | FC | 168.3 | -9~11  | 4.1  | 5.3  | 1.7 |
|            | DH | 224.3 | -10~9  | 3.4  | 4.2  | 1.9 |
|            | MF | 311.3 | -7~9   | 2.9  | 3.8  | 2.4 |

\*RE, relative error; ARE, average relative error; RSD, relative standard deviation;  $\mu_A$ , the uncertainty.

## 4 Discussion

### 4.1 Performance of gravimetric measurement systems (GMS) and error analysis in various snow stratigraphies

Natural snowpack develops from a series of winter snowfall and contains many layers with different characteristics (Sturm et al., 2002; Kärkäs et al., 2005). ~~The snow stratigraphic layers were defined by size of the grains and microstructure (Fierz et al. 2009).~~ This study analyzed experiments where the same measurement system was used to measure the density of the different snow stratigraphies to assess whether the same measurement system showed similar performance in different snow stratigraphies. Field experimental reports showed that the same measurement system had significantly different accuracy and precision in various snow stratigraphies (Table 2). For different snow stratigraphies in dry snow, the accuracy and precision of ~~GMS the box-cutter~~ showed as follows: ~~DF < FC < DH, DF (93.5 kg m<sup>-3</sup>) < FC (177.3 kg m<sup>-3</sup>) < DH (236.8 kg m<sup>-3</sup>).~~ ~~GMSThe box-cutter~~ had poor accuracy in lower density snow layers, which was in agreement with findings by Conger and McClung (2009), who found that the accuracy of GMS with 100cm<sup>3</sup> box-cutter in high density snowpack was higher than that in low density snowpack. Carrol (1977) and Proksch et al. (2016) also reported that ~~GMS the box-cutter~~ had poor accuracy and tends to overestimate density for lower density snow.

Snow has characteristics of easy compression and deformation (Sturm and Holmgren, 1998). Snow samples are compressed and sheared by the cutter and cover in the process of sampling, which can cause the densification of snow samples. This may result in density being overestimated. The degree of compression deformation of the snow sample is affected by the force and velocity of the thrust of the box into the snow. The force and speed of propulsion cannot be constant in each measurement in the field. Therefore, snow with greater compressibility is more susceptible to artificial manipulation, resulting in ~~GMS the measurement system~~ having high system error and measurement uncertainty. A

similar conclusion was reached by Hawley et al. (2008) who reported that unconsolidated snow near the snow surface affects the accuracy measurement of GMS. ~~Hawley et al. (2008) who reported that unconsolidated and low density snow near the snow surface affects the accuracy measurement of the measurement system,~~ but Hawley et al. (2008) did not further discuss and explain the reasons in detail.

It is difficult to quantify the compressibility of snow in the field, so we use hardness as an indicator (Pielmeier and Schneebeli, 2003). Snow compressibility decreases with the increase of the hardness (Kaur and Satyawali, 2017). Experimental observations found the hardness of snow layer in the following order: DH (92.0Kpa±7%) > FC (14Kpa±21%) > DF (4.9Kpa±40%) in dry snow (Fig. 5a).

This result can be explained by the fact that compressibility decreases with the increase of the size of grain and density in dry snow (Sturm and Holmgren, 1998; Kaur and Satyawali, 2017). Fig. 5b showed the shear strength of snow layer in the following order: DH (575Pa±9%) > FC (275Pa±14%) > DF (137Pa±27%) in dry snow, which can be explained by the fact that the shear strength of snow was higher when snow density is greater in dry snow (Abe and other, 2006). DF layer was located at the top

of the whole snow layer (Fig. 3) and had low temperature gradient metamorphism grains (Fierz et al., 2009; Techel and Pielmeier, 2011) with low density and small grain size (Table 1). Low density and small grain size of DF layer caused low shear strength and high compressibility (Fig. 5a), resulting in high susceptibility to compressive deformation and shear failure from external force. The degree of compressive deformation and shear failure varied greatly with each measurement for DF layer due to

low shear strength and hardness, so that measured density values showed high disparity and dispersion.

Therefore, the poorest accuracy and precision of GMS was found in DF layer. DH layer was located at the bottom of the whole snow layer, and its density and size of grain were the largest (Table 1). High density and large gain size of DH layer caused high shear strength and low compressibility with low variation, resulting in measured density values with relatively low disparity and dispersion. Across the

four dry snow layers, GMS showed the highest accuracy and precision in DH layer due to high shear strength and low compressibility which is a characteristic of DH layer. From the short review above, the accuracy and precision of GMS showed increased tendencies with increasing density and size of grain of snow, and the accuracy and precision of GMS showed as follows: DF < FC < DH in dry snow.

~~Snow compressibility decreases with the increase of the hardness. Experimental observations found~~

~~hardness and the shear strength of snow layer in the following order: DH > FC > DF in dry snow (Fig. 5).~~

~~This result can be caused by the fact that compressibility decreases with the increase of the size of grain~~

and density in dry snow (Sturm and Holmgren, 1998), and the shear strength of snow is higher when snow density is greater in dry snow (Abe and other, 2006). DF was located at the top of the whole snow layer (Fig. 3) and DF had low temperature gradient metamorphism grains (Fierz et al., 2009; Techel and Pielmeier, 2011) with low density and small grain size (Table 1). Low density and small grain size of DF caused low shear strength and high compressibility (Fig. 5a), resulting in high susceptibility to compressive deformation and shear failure from external force. The degree of compressive deformation and shear failure varied greatly with each measurement for DF, so that measured value showed high disparity and dispersion. Therefore, the poorest accuracy and precision of the measurement system was found in DF. DH was located at the bottom of the whole snow layer, and its density and size of grain were the largest (Table 1). High density and large gain size of DH caused high shear strength and low compressibility, resulting in measured values with relatively low disparity and dispersion. Across the four dry snow layers, the measurement system showed the highest accuracy and precision in DH due to high shear strength and low compressibility which is a characteristic of DH. From the short review above, the accuracy and precision of measurement system showed increased tendencies with increasing density and size of grain of snow, and the accuracy and precision of measurement system showed as follows:  $DF < FC < DH$  in dry snow.

In contrast, the density of MF layer was higher than that of DH layer, but the accuracy and precision of measurement system GMS in MF layer were lower than that in of DH layer (Table 3). MF has isothermal gradient metamorphism grains (Fierz et al. 2009), and the liquid water content of MF layer was 3.0%~4.5% (Table 3). The shear strength of snow showed decreasing tendencies with the increase of liquid water content (Yamanoi and Endo, 2002). Although the density of MF layer was higher than that of DH layer, experimental observation found the shear strength and hardness of MF layer were lower than that of DH layer (Fig. 5). This result can be explained by the fact that the accuracy and precision of GMS the measurement system in MF layer were lower than that in of DH layer. In summary, the native density, liquid water content, and the size of grain of four different snow layers caused the decrease of hardness and shear strength of the snow layers in the following order:  $DH > MF > FC > DF$  (Fig. 5), which led to the reduced accuracy and precision of GMS the measurement system in the same order. However, the study also found that GMS showed relatively low accuracy and precision in the ice layers and the bottom depth hoar layer which had relatively high density, which was in agreement with findings by López-Moreno et al (2020), who found that relative errors was high in

ice layers or snowpack impacted by heavily wind. Because ice layers and the bottom depth hoar have high shear strength and hardness, box-cutter and cover of GMS had difficulty to cut snow and a part of the snow sample was lost in the course of sampling. the study also found that the measurement system showed relatively low accuracy and precision in the ice layers and the bottom depth hoar layer which have relatively high density. Because ice layers and the bottom depth hoar have high shear strength and hardness, box-cutter and cover had difficulty cutting snow and a part of the snow sample was lost in the course of sampling.

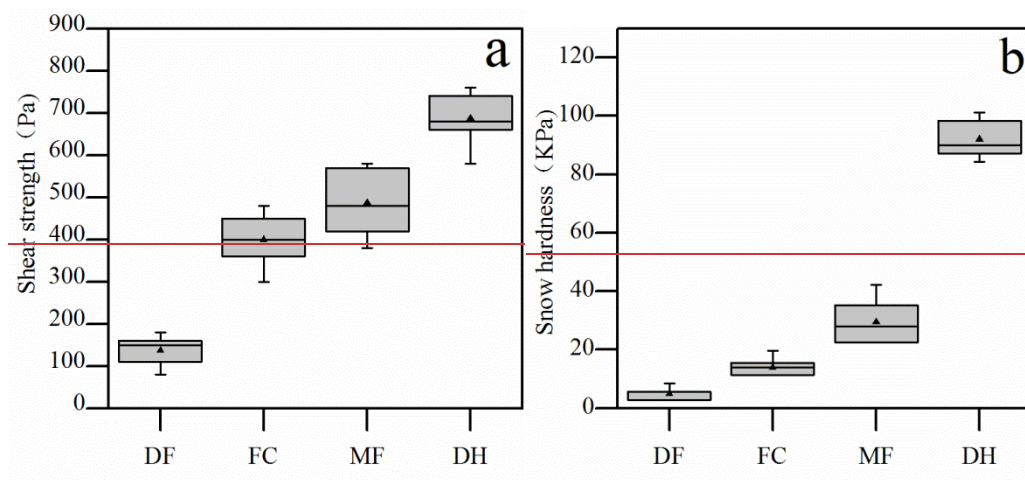

**Figure 5.** The mechanical properties of the target snow layer: (a) the shear strength of the target snow layer; (b) the hardness of the target snow layer. Boxes represent interquartile ranges (25th to 75th percentiles), thick horizontal bars in each box denotes the median (50th percentile), Whiskers (vertical lines and thin horizontal bars) represent the highest and lowest value within 1.5 times the interquartile range above the upper or below the lower quartile, respectively. Black small triangle denotes the average values.

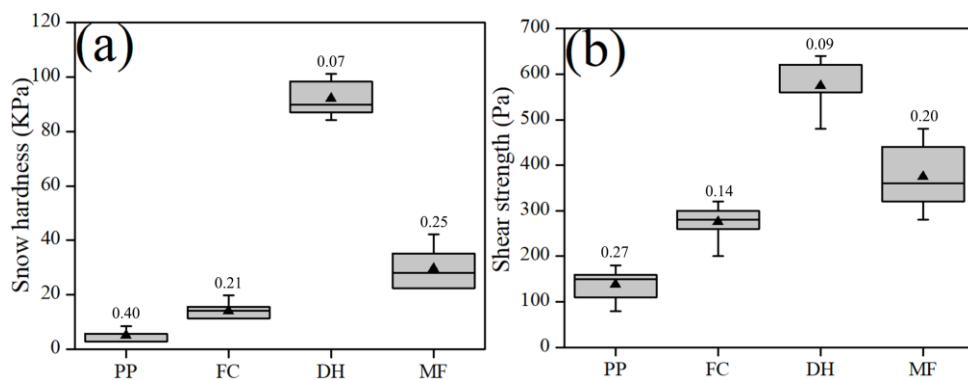

**Figure 5.** The mechanical properties of the target snow layer: (a) the hardness of the target snow layer;



(b) the shear strength of the target snow layer. Boxes represent interquartile ranges (25th to 75th percentiles), thick horizontal bars in each box denotes the median (50th percentile), Whiskers (vertical lines and thin horizontal bars) represent the highest and lowest value within 1.5 times the interquartile range above the upper or below the lower quartile, respectively. Black small triangle denotes the average values. The number above each box is the coefficient of variation among repeated measurements.

#### **4.2 Performance of dielectric permittivity measurement systems and error analysis**~~Performance of dielectric permittivity measurement systems in various snow stratigraphies~~

Dielectric permittivity measurement systems are based on the principle of measuring the response characteristics (travel time, reflection, attenuation) of an electromagnetic signal through snow (Frolov and Macheret, 1999). The ratio of water, air, and ice in snow determines the dielectric permittivity of snow (Tiuri and Sihvola, 1984; Schneebeli et al., 1998). The snow density is calculated using the electrical properties of ice, water, and air measured by the dielectric permittivity measuring instrument (Tiuri et al., 1984; Kovacs et al., 1995). The accuracy and precision of DMS in low density snow (snow class DF) were lower than that in high density snow (snow class FC, DH and MF) (Table 3). In terms of the accuracy of DMS, a similar result was showed by Hawley et al. (2008) who found RE up to 20% in the lower-density sections and 10–13% in the higher- density sections for DMS. Therefore, DMS was extremely unstable in low density snow. The accuracy and precision of the measurement system in low density snow (snow class DF) were lower than that in high density snow (snow class FC, DH and MF) (Table 3). In terms of the accuracy of dielectric permittivity measurement system, a similar result was showed by Hawley et al. (2008) who found RE up to 20% in the low density sections and 10–13% in the high density sections for the permittivity measurement system. Therefore, dielectric permittivity measurement system was extremely unstable in low density snow.

There are several other interesting facts worth discussing based on the findings of the field experiment. Hawley et al. (2008) ~~pointed out~~ ~~thought~~ that low density snow had a bigger air gap between the grains resulting in unstable capacitance readings. Sugiyama et al. (2010) reported that the structure of snow affected the stability of dielectric signals and the permittivity of unconsolidated snow was smaller than that of compacted snow. However, they did not consider how the damage of the resonator to the snow structure would affect the accuracy and precision of ~~–DMS dielectric permittivity~~

~~measurement system~~. Snow sampling was not compressed in ~~DMS~~ dielectric permittivity measurement, but snow structure was damaged when the resonator was inserted horizontally into the snow profile. The destruction resistance capability of snow affected the accuracy and precision of ~~DMS~~ the ~~measurement system~~. Disparity and dispersion of the measured value increased with the increasing degree of damage to the snow structure from the resonator. Because low density snow (snow class DF) had relatively low destruction resistance capability due to low shear strength and hardness (Fig. 5), ~~DMS~~ the ~~measurement system~~ showed poor accuracy and precision in low density snow. On the contrary, although the destruction resistant capability ~~in~~ MF layer was lower than that ~~in~~ DH layer, the accuracy and precision of the measurement system in MF layer were slightly higher than that of DH layer. The air gap between the grains in the MF layer is smaller than that in DH layer due to the existence of liquid water filling in the gap between the grains in MF layer, which results in relatively low variation of dielectric signals of DMS in MF layer when the resonator was inserted into the snow. Relatively stable dielectric signals of DMS in MF layer cause that the accuracy and precision of DMS in MF layer were slightly higher than that in DH layer. This can be explained by liquid water filling in the gap between the grains in the MF layer, resulting in relatively small air gap between the grains, which further led to relatively stable dielectric signals of the measurement system in the MF layer.

Temperature of the snow layer and sand-dust in snowpack also affect the dielectric permittivity of snow (Fujita et al., 1992; Dong et al., 2014). There were significant differences in temperature and sand-dust between snow layers. Because of the lack of conditions for measuring temperature and sand-dust in the field, we did not take the effect of temperature and sand-dust on ~~the measurement~~ accuracy and precision of DMS into consideration. Understanding the effects of these factors on density measurement would be worthwhile in future research projects.

### 4.3 Comparison of two measurement systems

There was significant difference in the snow density observed from the two measurement systems, and the difference varied with changes in snowpack characteristics. The mean density measured by DMS was 9% lower than that by GMS in dry snow, expressed as percentage of the mean of density from GMS, which is similar to the report by Leppänen et al. (2016). The density of DF, FC and DH layers from GMS overestimated that from DMS by 26.5%, 5.1%, and 5.3%, expressed as percentage of the mean of density from GMS (Table 3). The density differences between two measurement systems decreased with the increase in density. For the wet snowpack, the density from GMS was slightly lower

than that from DMS (Table 2 and Table 3). The density from the DMS overestimated that from GMS measurement system by 2% in MF layer, expressed as percentage of the mean of density from GMS (Table 2 and Table 3). From what has been discussed above, DMS appeared to underestimate snow density in the dry-low density sections with respect to GMS but agreed with or slightly overestimated the wet-high density sections.

~~For dry snow, because snow was compressed in the process of cutter sampling, the density data from the box cutter were much greater than that from the Snow Fork (Table 2). The whole dry snowpack density from the box cutter was higher than that from the Snow Fork by 10%, expressed as percentage of the mean Snow Fork density (Table 2). Leppänen et al. (2016) also reported that the snow density from the Snow Fork was lower than that from the gravimetric measurement system. The density of DF, FC and DH from the box cutter overestimated that from the Snow Fork by 34%, 5%, and 6 %, respectively (Table 3). The density differences between the two measurement systems decreased with the increase in density. The same result was reported by Hawley et al. (2008) who found the dielectric permittivity measurement system underestimated density in the lower density sections but was close to the gravimetric measurement system for the higher density sections in dry snow. For the whole wet snowpack, the density from box cutter was slightly lower than that from the Snow Fork (Table 2). The density from the box cutter measurement system underestimated that from the Snow Fork measurement system by 3% in the MF snow layer (Table 2). In summary, the box cutter appeared to overestimate snow density in the lower density sections with respect to the Snow Fork densities but agreed with or slightly underestimated the higher density sections. A similar phenomenon was presented in the comparison of micro-computed tomography ( $\mu$ CT) and box cutter, where the box cutter tended to overestimate low density sections and underestimate high density sections with respect to the  $\mu$ CT densities in the field (Proksch et al., 2016).~~

The accuracy and precision of GMS and DMS showed lower accuracy and precision in low density snow (snow class DF) due to lower shear strength and hardness of lower-density snow. The difference in the accuracy and precision of two measurement systems showed decreasing tendencies with increasing density. Compared with GMS, DMS showed very poor accuracy and precision. The weight of GMS (box-cutter, flat shovel and balance scales) was lighter than that of DMS (the Snow Fork) (Table 4). GMS was also easier for surveyors to carry in the cold environment. Although GMS may cause some errors as some of snow escaped from the sampler or stayed in the sampler during the

transfer from sampler to weighing scales, these error sources are minimized by carefully cleaning the  
645 sampler and weighing scales during the measurements. Based on the above analysis, GMS was more  
suitable for field snow density measurement than DMS. However, the vertical resolution of DMS in the  
millimeter range was clearly a significant advantage on the centimeter resolution of GMS with the  
box-cutter (Table 4). GMS was usually insufficient to resolve the small-scale spatial fluctuations in  
density so it may not meet the needs of some research. Measurement of DMS had less time than that  
650 GMS did in the cold environment. The surveyor needed an assistant to record data during GMS  
measurement, but DMS could automatically save data (Table 4). The most remarkable advantage of  
DMS over GMS was that DMS can measure density and obtain liquid water content in snowpack at the  
same time in the wet snowpack.

~~The accuracy and precision of the box cutter and the Snow Fork showed lower accuracy and~~  
655 ~~precision in low density snow (snow class DF) due to lower shear strength and hardness of low density~~  
~~snow. The difference in the accuracy and precision of the two measurement systems showed decreasing~~  
~~tendencies with increasing density. At present, from the perspective of accuracy and precision only, the~~  
~~box cutter performed better than the Snow Fork in the field, especially in low density snowpack, where~~  
~~the Snow Fork showed very poor accuracy and precision. The weight of the box cutter (box cutter, flat~~  
660 ~~shovel and balance scales) was lighter than the Snow Fork (Table 4). The box cutter was also easier for~~  
~~surveyors to carry in the cold environment. Although some of snow escaped from the sampler or stays~~  
~~in the sampler during the transfer from sampler to weighing scales causing some errors, these error~~  
~~sources are minimized by carefully cleaning the sampler and weighing scales during the measurements.~~  
~~Therefore, based on the above analysis, the box cutter was more suitable for field snow density~~  
665 ~~measurement than the Snow Fork. However, the vertical resolution of the Snow Fork in the millimeter~~  
~~range was clearly a significant advantage on the centimeter resolution of the box cutter (Table 4). The~~  
~~box cutter was usually insufficient to resolve the small scale spatial fluctuations in density so it may~~  
~~not meet the needs of some research. Measurement time of the Snow Fork was less than the box cutter~~  
~~in the cold environment. The surveyor needed an assistant to record data in the box cutter system~~  
670 ~~measuring, but the Snow Fork could automatically save data (Table 4). The most remarkable advantage~~  
~~of the Snow Fork over the box cutter was that the Snow Fork system can measure density and obtain~~  
~~liquid water content in snowpack at the same time in the wet snowpack.~~

**Table 4.** Vertical resolution and weight of the different measurement system. Measurement time in the field is per meter of snow depth and includes digging a snow pit.

| Measurement system | Vertical resolution<br>(mm) | Weight<br>(kg) | Measurement time | Cost<br>(US dollar) | Data record       |
|--------------------|-----------------------------|----------------|------------------|---------------------|-------------------|
| Box-cutter         | 30                          | 21.0           | 60min            | 20                  | Manual records    |
| Snow Fork          | 3                           | 1.3            | 40min            | 14500               | Automatic records |

**Table 4.** Vertical resolution and weight of gravimetric measurement system (GMS) and dielectric permittivity measurement system (DMS). Measurement time in the field is per meter of snow depth and includes digging a snow pit.

| Measurement system  | Vertical resolution<br>(mm) | Weight<br>(kg) | Measurement time | Cost<br>(US dollar) | Data record       |
|---------------------|-----------------------------|----------------|------------------|---------------------|-------------------|
| GMS (Box-cutter)    | 30                          | 1.3            | 60min            | 20                  | Manual records    |
| DMS (The Snow Fork) | 3                           | 21.0           | 40min            | 14500               | Automatic records |

Snow density from the two measurement systems was significantly different. The box-cutter either over- or underestimated the snow density relative to the Snow Fork under different snow conditions.

Different measurement systems might be used in field snow measurement due to different study conditions, such as labour needs, data requirements, and different research teams and institutions. Therefore, it was difficult to build a unified and optimized snow global database. Assimilation of the data obtained by different measurement systems provided an effective way to solve the above problem.

The correlation of the density from GMS-box-cutter-system ( $\rho_b$ ) with the density from DMS-the Snow Fork system ( $\rho_s$ ) at the same snowpack was investigated in the dry and wet snow (Fig. 6).

Least-squares linear regression gave the coefficients of the relationship

$$\rho_b = a\rho_s^2 + b\rho_s \quad (6)$$

as  $a = 0.11 \times 10^{-2}$  and  $b = 130.75 \times 10^{-2}$  with  $R^2 = 0.95$  in the dry snow (Fig. 6b), and as  $a = 0.07 \times 10^{-2}$  and  $b = 123.8 \times 10^{-2}$  with  $R^2 = 0.88$  in the wet snow (Fig. 6b).

As  $a = -0.11 \times 10^{-2}$  and  $b = 130.75 \times 10^{-2}$  in the dry snow (Fig. 6a), and as  $a = -0.07 \times 10^{-2}$  and  $b = 123.8 \times 10^{-2}$  in the wet snow (Fig. 6b).

The density from GMS-box-cutter was greater than that from DMS-the Snow Fork in the dry snowpack. Whereas the density from box-cutter tended to overestimate low densities and underestimate high densities with respect to the density from the Snow Fork, with a threshold of  $318 \text{ kg m}^{-3}$  in the wet snowpack (Fig. 6b).

The correlation of the density from GMSbox-cutter and DMS-the Snow Fork at the same snowpack was investigated using all the data obtained from this study (Fig. 7). Least-squares linear regression gives the coefficients of the relationship as  $a = -0.08 \times 10^{-2}$  and  $b = 126.13 \times 10^{-2}$  with  $R^2 = 0.97$ .

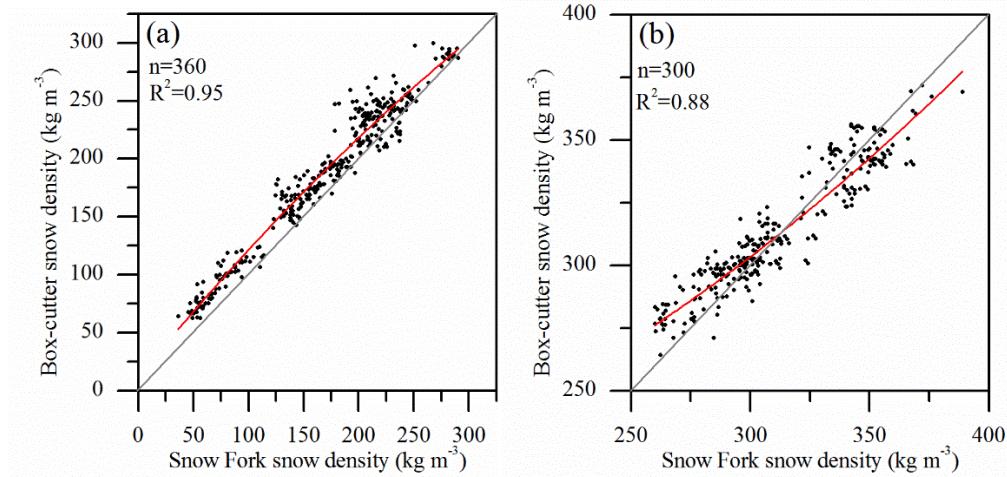

**Figure 6.** Gravimetric measurement system(box-cutter) vs dielectric permittivity measurement system (Snow Fork). The lines correspond to the linear regression of the two datasets (a) dry snow; (b) wet snow.

**Figure 6.** Box-Cutter density vs Snow Fork density. The lines correspond to the linear regression of the two datasets (a) dry snow; (b) wet snow.

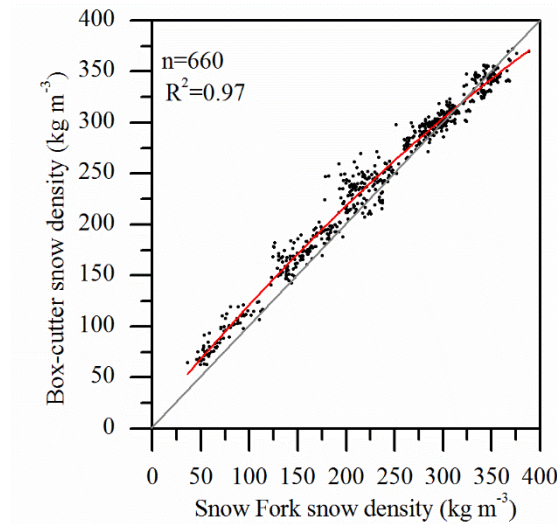

**Figure 7.** Plots of all the data on the permittivity vs snow density. The lines correspond to the linear regression of the two datasets.

**Figure 7.** Plots of all the data on gravimetric measurement system(box-cutter) vs dielectric permittivity measurement system (Snow Fork). The lines correspond to the linear regression of the two datasets.

## 5 Conclusions

This study compared snow density measured by gravimetric measurement system with 100cm<sup>3</sup> box-cutter and dielectric permittivity measurement system with Snow Fork in the TSSAR in the winter of 2017-2018. The results showed that the snow density from two measurement systems was significantly different in the same snowpack. The snow density from dielectric permittivity measurement system tended to underestimate dry-low density and overestimate wet-high density with respect to the snow density from gravimetric measurement system.  
~~This study compared snow density measured by the box cutter and the Snow Fork measurement systems in the TSSAR in the winter of 2017-2018. The results showed that the snow density from two measurement systems was significantly different in the same snowpack. The snow density from the box cutter system tended to overestimate low density and underestimate high density with respect to the snow density from the Snow Fork system.~~  
The density in layers consisting of low temperature gradient metamorphism grains (snow class DF) was more frequently falsely estimated than that in layers consisting of high temperature gradient metamorphism grains (snow class FC, DH) or isothermal gradient metamorphism grains (snow class MF) in all measurement systems.

The accuracy and precision of density measurement systems are critical for experiments and observations of snow. Each system for density measurement has its own advantages and limitations. Two measurement systems showed poor accuracy and precision in low-density dry snow. Both measurement systems need further refinement for use on low density dry snow (snow class DF). Compared with gravimetric measurement system, dielectric permittivity measurement system showed very poor accuracy and precision. Although gravimetric measurement system is generally a more reliable method for density measurement, its resolution is low and its damage to snow profile is more serious than dielectric permittivity measurement system.  
~~The accuracy and precision of density measurement systems are critical for experiments and observations of snow. Each system of density measurement has its own advantages and limitations. The two measurement systems showed poor accuracy and precision in low-density dry snow. Both measurement systems need further refinement for use on low density snow (snow class DF). The accuracy and precision of the box cutter were better than that of the Snow Fork in field observation. Although the box cutter is generally a more reliable method for density measurement, its resolution is low and its damage to snow profile is more serious than Snow Fork.~~  
Furthermore, there was a slight difference between the Snow Fork densities and box-cutter densities in wet snowpack, and the Snow Fork can obtain liquid water content data while



measuring density. Considering the accuracy, cost, labour needs, and data requirements, the study results suggest snow surveyors use box-cutter systems during dry snow and the Snow Fork systems during wet snow in the investigation of snow characteristics. This will help surveyors obtain more reliable data and optimize field measurements.

Our study could provide an approach which will aid researchers in assimilating data from separate studies obtained with different measurement systems and integrating single studies into larger databases. However, the lack of data from other measurement systems (  $\mu$  CT, neutron-scattering probe, other type cutters, etc) makes it difficult to compare and evaluate the performance of other measurement systems across the different snow stratigraphies. The data collection from other measurement systems can help to build a better data assimilation scheme in the future.

*Acknowledgements.* This work was supported by the National Project of Investigation of Basic Resources for Science and Technology (Grant No. 2017FY100501), the National Natural Science Foundation of China (NSFC Grant U1703241) and CAS Instrumental development project of Automatic Meteorological Observation System with Multifunctional Modularization. We are grateful to the supports in field and laboratory work from the Tianshan Station for Snowcover and Avalanche Research, Chinese Academy of Sciences.

*Author Contributions:* Jiansheng Hao conceived and designed the study, and wrote the paper. Jiansheng Hao, Farong Huang, Ditao Chen performed the experiments. Lanhai Li and Shuyong Mu contributed to discussions and revisions.

*Conflicts of Interest:* The authors declare that they have no conflict of interest.

*Data availability statement:* The data related to this article is available online at <https://doi.org/10.5194/gi-2020-14-supplement>.

## Appendix

Snow density ( $\rho$ ) and liquid water content (LWC) were accurately measured by the Snow Fork. The resonant frequency, attenuation and 3 dB band measured by the Snow Fork are inserted into Eq. (7, 8, 9), which are used to calculate real( $\varepsilon'$ ) and imaginary ( $\varepsilon''$ ) parts of permittivity.

$$B_{air} = 0.04(f - 400) \quad (7)$$

$$\varepsilon' = \left(\frac{f_{air}}{f}\right)^2 \quad (8)$$

$$\varepsilon'' = \frac{B - B_{air}}{f \varepsilon'} \quad (9)$$

where  $f$  is the resonant frequency (GHz). The resonant frequency, real and imaginary parts of permittivity are obtained, and  $k$  is a constant ( $k=1.2142857$ ). They inserted into Eq (10, 11), which are used to derive LWC and  $\rho$  through real and imaginary parts of permittivity.

$$LWC = -0.06 + \sqrt{(0.06)^2 + \frac{\varepsilon''}{0.0075f}} \quad (10)$$

$$\rho = -k + \sqrt{k - \frac{1 + 8.7LWC + 70LWC^2 - \varepsilon'}{0.7}} + LWC \quad (11)$$

## References

- Abe, O., Xu, J. R., Liu, J., Hirashima, Y., Mochizuki, S., Yamaguchi, S., Sato, T., and Sato, A.: Shear strength of natural and artificial depth hoar layers, in: Proceedings, Marmot, CO, 7-14, 2006.
- Barnett, T. P., Adam, J. C., and Lettenmaier, D. P.: Potential impacts of a warming climate on water availability in snow-dominated regions, *Nature*, 438, 303-309, 2005.
- BIPM, IEC, IFCC, ISO, IUPAC, IUPAP, and OIML: Evaluation of measure data guide to the expression of uncertainty in measure JCGM 100:2008, BIPM Joint Committee for Guides in Metrology, Paris, 2008.
- Bormann, K. J., Westra, S., Evans, J. P., and McCabe, M. F.: Spatial and temporal variability in seasonal snow density, *J. Hydrol.*, 484, 63-73, <https://doi.org/10.1016/j.jhydrol.2013.01.032>, 2013.
- Brun, E., Martin, E., Simon, V., Gendre, C., Coleou, C.: An energy and mass model of snow cover suitable for operational avalanche forecasting, *J. Glaciol.*, 35, 333-342, 1989.
- Calonne, N., Flin, F., Morin, S., Lesaffre, B., Rolland du Roscoat, S., and Geindreau, C.: Numerical and experimental investigations of the effective thermal conductivity of snow, *Geophys. Res. Lett.*, 38, L23501, <https://doi.org/10.1029/2011GL049234>, 2011.
- Calonne, N., Geindreau, C., Flin, F., Morin, S., Lesaffre, B., Rolland du Roscoat, S., and Charrier, P.: 3-D image-based numerical computations of snow permeability: links to specific surface area, density, and microstructural anisotropy, *The Cryosphere*, 6, 939-951, <https://doi.org/10.5194/tc-6-939-2012>, 2012.
- Carroll, T.: A comparison of the CRREL 500 cm<sup>3</sup> tube and the ILTS 200 and 100 cm<sup>3</sup> box cutters used for determining snow densities, *J. Glaciol.*, 18, 334-337, 1977.
- Conger, S. M. and McClung, D.: Instruments and Methods: Comparison of density cutters for snow profile observations, *J. Glaciol.*, 55, 163-169, <https://doi.org/10.3189/002214309788609038>, 2009.

- De Michele, C., Avanzi, F., Ghezzi, A., and Jommi, C.: Investigating the dynamics of bulk snow density in dry and wet conditions using a one-dimensional model, *The Cryosphere*, 7, 433–444, <https://doi.org/10.5194/tc-7-433-2013>, 2013.
- Denoth, A.: The Pendular-Funicular Liquid Transition in Snow, *J. Glaciol.*, 25(91), 93-98, 1980.
- Dong, Q. F., Li, Y. L., Xu, J. D., Zhang, H., and Wang, M. J.: Effect of sand and dust storms on microwave propagation, *IEEE Trans. Antennas Propag.*, 61, 910-916, 2013.
- Elster, C.: Calculation of uncertainty in the presence of prior knowledge, *Metrologia*, 44(2), 111, 2007.
- Fierz, C., Armstrong, R., Durand, Y., Etchevers, P., Greene, E., McClung, D., Nishimura, K., Satyawali, P., and Sokratov, S. A.: The international classification for seasonal snow on the ground, HPVII Technical Documents in Hydrology No. 83, IACS Contribution No. 1, UNESCO-IHP, Paris, 2009.
- Frolov, A. D., and Macheret, Y. Y.: On dielectric properties of dry and wet snow. *Hydrol. Process.*, 13, 1755–1760, 1999.
- Fujita, S., Shiraishi, M., and Mae, S.: Measure on the microwave dielectric constant of ice by the standing wave method, In: *Physics and Chemistry of Ice*, Hokkaido University Press Sapporo, 415-421, 1992.
- Gergely, M., Schneebeli, M., and Roth, K.: First experiments to determine snow density from diffuse nearinfrared transmittance, *Cold Reg. Sci. Technol.*, 64, 81–86, <https://doi.org/10.1016/j.coldregions.2010.06.005>, 2010.
- Hannula, H.-R., Lemmetyinen, J., Kontu, A., Derksen, C., and Pulliainen, J.: Spatial and temporal variation of bulk snow properties in northern boreal and tundra environments based on extensive field measurements, *Geosci. Instrum. Method. Data Syst.*, 5, 347–363, <https://doi.org/10.5194/gi-5-347-2016>, 2016.
- Hao, J. S., Huang, F. R., Liu, Y., Amobichukwu, C. A., and Li, L.H.: Avalanche activity and characteristics of its triggering factors in the western Tianshan Mountains, China, *J. Mt. Sci.*, 15, 1394-1411, <https://doi.org/10.1007/s11629-018-4941-2>, 2008.
- Harper, J. T. and Bradford, J. H.: Snow stratigraphy over a uniform depositional surface: spatial variability and measurement tools, *Cold Reg. Sci. Technol.*, 37, 289–298, [https://doi.org/10.1016/S0165-232X\(03\)00071-5](https://doi.org/10.1016/S0165-232X(03)00071-5), 2003.
- Hawley, R. L., Brandt, O., Morris, E. M., Kohler, J., Shepherd, A. P., and Wingham, D. J.: Instruments and Methods: Techniques for measuring high-resolution firn density profiles: case study from Kongsvegen, Svalbard, *J. Glaciol.*, 54, 463–468, <https://doi.org/10.3189/002214308785837020>, 2008.
- Huning, L. S. and AghaKouchak, A.: Mountain snowpack response to different levels of warming, *Proceedings of the National Academy of Sciences of the United States of America*, *Pro. Natl. Acad. Sci.*, 115, 10932–10937. <https://doi.org/10.1073/pnas.1805953115>, 2018.
- ISO: Accuracy (trueness and precision) of measure methods and results - Part 1: General principles and definitions, 1994.
- Jamieson, B. and Johnston, C. D.: Evaluation of the shear frame test for weak snowpack layers, *Ann. Glaciol.*, 32, 59-69, <https://doi.org/10.3189/172756401781819472>, 2001.
- Jamieson, B., Zeidler, A., and Brown, C.: Explanation and limitations of study plot stability indices for forecasting dry snow slab avalanches in surrounding terrain, *Cold Reg. Sci. Technol.*, 50(1-3), 23-34. <https://doi.org/10.1016/j.coldregions.2007.02.010>, 2007.
- Jonas, T., Marty, C., and Magnusson, J.: Estimating the snow water equivalent from snow depth measures in the Swiss Alps, *J. Hydrol.*, 378(1-2), 161–167,

<https://doi.org/10.1016/j.jhydrol.2009.09.021>, 2009.

Kärkäs, E., Martma, T., and Sonninen, E.: Physical properties and stratigraphy of surface snow in western Dronning Maud Land, Antarctica. *Polar Res.*, 24, 55-67, <https://doi.org/10.3402/polar.v24i1.6253>, 2005.

Kaur, S., and Satyawali, P. K.: Estimation of snow density from SnowMicroPen measurements, Cold Reg. Sci. Technol., 134, 1-10, <https://doi.org/10.1016/j.coldregions.2016.11.001>, 2017.

Kinar, N., and Pomeroy, J. W.: Measure of the physical properties of the snowpack. *Rev. Geophys.*, 53, 481-544, <https://doi.org/10.1002/2015RG000481>, 2015.

Kovacs, A., Gow, A. J., and Morey, R. M.: The in-situ dielectric constant of polar firn revisited, *Cold Reg. Sci. Technol.*, 23(3), 245-256, 1995.

Lehning, M., Bartelt, P., Brown, B., Fierz, C., and Satyawali, P. K.: A physical SNOWPACK model for the Swiss avalanche warning Part II. Snow microstructure, *Cold Reg. Sci. Technol.*, 35, 147-167, doi:10.1016/S0165-232X(02)00073-3, 2002.

Leppänen, L., Kontu, A., Hannula, H.-R., Sjöblom, H., and Pulliainen, J.: Sodankylä manual snow survey program, *Geosci. Instrum. Method. Data Syst.*, 5, 163-179, <https://doi.org/10.5194/gi-5-163-2016>, 2016.

López-Moreno, J. I., Leppänen, L., Luks, B., Holko, L., Picard, G., Sanmiguel - Vallelado, A., Alonso - González, E., Finger, D. C., Arslan, A.N., Gillemot, K. and Sensoy, A.: Intercomparison of measurements of bulk snow density and water equivalent of snow cover with snow core samplers: instrumental bias and variability induced by observers, *Hydrol. Process.*, <https://doi.org/10.1002/hyp.13785>, 2020.

Lu, H., Wei, W. S., Liu, M. Z., Han, X., Li, M., and Hong, W.: Variations in seasonal snow surface energy exchange during a snowmelt period: an example from the Tianshan Mountains, China, *Meteorol Appl*, 23, 14-25, <https://doi.org/10.1002/met.1511>, 2016.

Ma, W., and Hu R. J.: Relationship between the development of depth hoar and avalanche release in the Tian Shan mountains, China. *J. Glaciol.*, 36, <https://doi.org/10.3189/S0022143000005529>, 1990.

Mellor, M., A review of basic snow mechanics, *IAHS-AISH Pub.*, 114, 251-291, 1975.

Nakamura, T., Abe, O., Hashimoto, R., and Ohta, T.: A dynamic method to measure the shear strength of snow, *J. Glaciol.*, 56, 333-338, <https://doi.org/10.3189/002214310791968502>, 2010.

Okuyama, J., Narita, H., Hondoh, T., and Koerner, R. M.: Physical properties of the ice core from Penny Ice Cap, Baffin Island, Canada, and derived climatic records, *J. Geophys. Res.*, 108(B2), 2090. <https://doi.org/10.1029/2001JB001707>, 2003.

Pielmeier, C. and Schneebeli, M.: Stratigraphy and changes in hardness of snow measured by hand, ramsonde and snow micro penetrometer: a comparison with planar sections, *Cold Reg. Sci. Technol.*, 37(3): 393-405, [https://doi.org/10.1016/S0165-232X\(03\)00079-X](https://doi.org/10.1016/S0165-232X(03)00079-X), 2003.

Proksch, M., Rutter, N., Fierz, C., and Schneebeli, M.: Intercomparison of snow density measures: bias, precision, and vertical resolution, *The Cryosphere*, 10(1), 371-384. <https://doi.org/10.5194/tc-10-371-2016>, 2016.

Rixen, C., Freppaz, M., Stoeckli, V., Huovinen, C., Huovinen, K., and Wipf, S.: Altered snow density and chemistry change soil nitrogen mineralization and plant growth, *Arct Antarct Alp Res.*, 40(3), 568-575. [https://doi.org/10.1657/1523-0430\(07-044\)\[RIXEN\]2.0.CO;2](https://doi.org/10.1657/1523-0430(07-044)[RIXEN]2.0.CO;2), 2008.

Schneebeli, M., Coléou, C., Touvier, F., and Lesaffre, B.: Measure of density and wetness in snow using time-domain reflectometry, *Ann. Glaciol.*, 26, 69-72, <https://doi.org/10.3189/1998AoG26-1-69-72>, 1998.

- Schweizer, J., Jamieson, J. B.: Snow cover properties for skier triggering of avalanches, *Cold Reg. Sci. Technol.*, 33 (2–3), 207–221, [https://doi.org/10.1016/S0165-232X\(01\)00039-8](https://doi.org/10.1016/S0165-232X(01)00039-8), 2001.
- Sihvola, A. and Tiuri, M.: Snow fork for field determination of the density and wetness profiles of a snow pack, *IEEE T. Geosci. Remote*, GE-24, 717–721, 1996.
- Skiles, M. K., Flanner, M., Cook, J. M., Dumont, M., and Painter, T. H.: Radiative forcing by light-absorbing particles in snow. *Nature Climate Change*, *Nat. Clim. Change*, 8, 864–971, <https://doi.org/10.1038/s41558-018-0296-5>, 2018.
- Sturm, M., and Holmgren, J.: Differences in compaction behavior of three climate classes of snow, *Ann. Glaciol.*, 26, 125–130, <https://doi.org/10.3189/1998AoG26-1-125-130>, 1998.
- Sturm, M., Holmgren, J., and Perovich, D. K.: Winter snow cover on the sea ice of the Arctic Ocean at the Surface Heat Budget of the Arctic Ocean (SHEBA): temporal evolution and spatial variability, *J. Geophys. Res.*, 107(C10), 8047, <https://doi.org/10.1029/2000JC000400>, 2002.
- Sturm, M., Holmgren, J., König, Max, and Morris, K.: The thermal conductivity of seasonal snow, *The thermal conductivity of seasonal snow. J. Glaciol.*, 43(143), 26–41. <https://doi.org/10.3189/S0022143000002781>, 1997.
- Sturm, M., Taras, B., Liston, G. E., Derksen, C., Jonas, T., and Lea, J.: Estimating snow water equivalent using snow depth data and climate classes, *J. Hydrometeorol.*, 11(6): 1380–1394. <https://doi.org/10.1175/2010JHM1202.1>, 2010.
- Sugiyama, S., Enomoto, H., Fujita, S., Fukui, K., Nakazawa, F., and Holmlund, P.: Dielectric permittivity of snow measured along the route traversed in the Japanese–Swedish Antarctic Expedition 2007/08, *Ann. Glaciol.*, 51, 9–15, <https://doi.org/10.3189/172756410791392745>, 2010.
- Takeuchi, Y., Nohguchi, Y., Kawashima, K., and Izumi, K.: Measurement of snow-hardness distribution, *Ann. Glaciol.*, 26, 27–30. <https://doi.org/10.3189/1998AoG26-1-27-30>, 1998.
- Techel, F., and Pielmeier, C.: Point observations of liquid water content in wet snow—investigating methodical, spatial and temporal aspects, *The Cryosphere*, 5, 405–418, <https://doi.org/10.5194/tc-5-405-2011>, 2011.
- Tiuri, M., Sihvola, A., Nyfors, E., and Hallikainen, M.: The Complex Dielectric Constant of Snow at Microwave Frequencies, *IEEE J. Oceanic Eng.*, 9, 377–382, 1984
- Toikka: Snow Fork – a portable instrument for measuring the properties of snow., Ins.toimisto Toikka Oy, Espoo, Finland, <http://www.toikkaoy.com/>, p. 2, 2009
- Wang, X. and Baker, I.: Observation of the microstructural evolution of snow under uniaxial compression using X-ray computed microtomography, *J. Geophys. Res.-Atmos.*, 118, 12371–12382, <https://doi.org/10.1002/2013JD020352>, 2013.
- Wilhelms, F.: Explaining the dielectric properties of firm as a density-and-conductivity mixed permittivity (DECOMP), *Geophys. Res. Lett.*, 32, L16501, <https://doi.org/10.1029/2005GL022808>, 2005.
- Yamanoi, K., and Endo, Y.: Dependence of shear strength of snow cover on density and water content, Seppyo, *J. Jpn. Soc. Snow Ice*, 64, 443–451, 2002.
