# Supplementary material for: Performance of snow density measurement systems insnow stratigraphies
Source: Copernicus journal article supplement (doi:10.5194/gi-2020-14), 2020-06-02
Supplement: Supplementary file [file gi-2020-14-AC4-supplement.zip]

# Performance of snow density measurement systems in snow stratigraphies

Jiansheng Hao<sup>1,2,3,4</sup>, Farong Huang<sup>1,2,3,4,5</sup>, Ditao Chen<sup>1,2,3</sup>, Shuyong Mu<sup>6</sup>, Lanhai Li<sup>1,2,3,4,5</sup>

<sup>1</sup>State Key Laboratory of Desert and Oasis Ecology, Xinjiang Institute of Ecology and Geography, Chinese Academy of Sciences, Urumqi 830011, China

<sup>2</sup>Ili Station for Watershed Ecosystem Research, Chinese Academy of Sciences, Xinyuan 835800, China

<sup>3</sup>University of Chinese Academy of Sciences, Beijing 100049, China

<sup>4</sup>CAS Research Center for Ecology and Environment of Central Asia, Urumqi 830011, Xinjiang, China

<sup>5</sup>Xinjiang Key Laboratory of Water Cycle and Utilization in Arid Zone, Urumqi 830011, Xinjiang, China

<sup>6</sup>Xinjiang Regional Center of Resources and Environmental Science Instrument, Chinese Academy of Sciences, Urumqi 830011, China

Correspondence to: Lanhai Li (lilh@ms.xjb.ac.cn)

**Abstract.** Gravimetric and dielectric permittivity measuring systems are applied to measure snow density, but few studies have addressed differences between two measurement systems under complex snowpack conditions. A field experiment was conducted to measure snow density using two measurement systems in different stratigraphical layers consisting of fragmented precipitation particles (DF), faceted crystals particles (FC), depth hoar (DH) and melt forms (MF), and the performance of measurement systems was analyzed and compared. The results showed that the measured density from dielectric permittivity measurement system overestimated dry snow densities and underestimated wet snow densities with respect to the densities from gravimetric measurement system. Compared with the gravimetric measurement system, the dielectric permittivity measurement system has relatively low precision and accuracy in the DF, FC and DH layers, and presents a similar precision and accuracy in the MF layer with high liquid water content. By comparing the precision and accuracy as well as merits and drawbacks of two measurement systems, it was concluded that using gravimetric measurement system during dry snow period and dielectric permittivity measurement system during wet snow period will help surveyors obtain more reliable data. Furthermore, the study provided an approach which will facilitate the integration of the data obtained from different studies with different measurement systems into global databases.

## 1 Introduction

Snow cover is a critical component linking the global climate system and the earth surface system, and provides water resources to large populations worldwide (Huning and AghaKouchak, 2018; Skiles et al., 2018; Barnett et al., 2005; Sturm et al., 2002). Density is one of the fundamental and important

snow properties, which varies over time (Carrol, 1977; Conger and McClung, 2009; De Michele et al., 2013). It plays a key role in shaping a wide range of snow properties and physical processes (Bormann et al., 2013). Snow mechanical parameters are determined and estimated based on its density (Jamieson and Johnston, 2001; Abe, et al., 2006; Wang and Baker, 2013; Hannula et al., 2016). Permeability, photochemistry and thermal conductivity are linked to density and depend on vertical density variations (Sturm et al., 1997; Calonne et al., 2011, 2012). Snow density is also an indispensable input parameter for snow dynamic models such as SNOWPACK (Lehning et al., 2002) and CROCUS (Brun et al., 1989). Snow density has many applications in hydrological cycle studies (Sturm et al., 2010), water resources management (Barnett et al., 2005; Huning and AghaKouchak, 2018; Jonas et al., 2009), ecosystem studies (Rixen et al., 2008), climatology studies (Okuyama et al., 2003) and avalanche forecasts (Schweizer and Jamieson, 2001). It is therefore essential to measure snow density for cryospheric and hydrological studies. A precise and standardized measurement of snow density is of major importance to better understand snow dynamics. However, different studies with similar aims often used different measurement systems to obtain snow density, and snow density data from different measurement systems in the same snowpack was significantly different (Hawley et al., 2008; Conger and McClung, 2009; Bormann et al., 2013; Proksch et al., 2016). It is difficult to integrate snow density data from different studies with different measurement systems into global databases due to lack of quality control and assimilation of snow density from different measurement systems (Bormann et al., 2013).

Snow density has been measured in the field and laboratories using various measurement systems. These measurement systems include gravimetric measurement system (GMS), dielectric permittivity measurement system (DMS), the neutron-scattering probe (NSP), micro-computed tomography (MCT) and diffuse near-infrared transmission (DNT) (Hawley et al., 2008; Conger and McClung, 2009; Proksch et al., 2016; Gergely et al., 2010). In the field, snow density is normally measured by technical staff, and measurements are made at flat study plots (Schweizer and Jamieson, 2001; Conger and McClung, 2009, Proksch et al., 2016). Taking the cost of measuring equipment, the technical simplicity and the efficiency of observation into consideration, GMS and DMS are often applied to measure snow density in the field (Hawley et al. et al. 2008; Conger and McClung, 2009; Wilhelms, 2005; Kinar and Pomeroy, 2015). GMS consists of two parts: high precision electronic balance and different style cutters with a given volume. To determine snow density, a core sample of snow is extracted from the

snow profile using a snow sampler. The density of the sampled snow is determined by weighted snow mass divided by the cutter's volume with a unit of  $\text{kg m}^{-3}$ . DMS is based on the principle of measuring the response characteristics (travel time, reflection, attenuation) of an electromagnetic signal through snow (Frolov and Macheret, 1999). The ratio of water, air, and ice in snow determines the dielectric permittivity of snow (Tiuri and Sihvola, 1984; Schneebeli et al., 1998). Snow density is calculated using the electrical properties of ice, water, and air measured by DMS (Tiuri et al., 1984; Kovacs et al., 1995). Carroll (1977) reported that there was no significant difference among 200 $\text{cm}^3$ , and 100 $\text{cm}^3$  box-type cutters and 500 $\text{cm}^3$  tube-type cutters for snow density measurement, and that inexperienced operators tended to overestimate the densities compared with more experienced workers. Hawley et al. (2008) evaluated the accuracy of GMS, DMS and NSP. DMS underestimated snow densities in lower-density snow but agreed with the GMS for higher-density snow. Conger and McClung (2009) compared snow density measurement using box-, wedge-, and cylinder-type density cutters, and reported that the variation of snow density is about 3–12% among the three cutter types. Proksch et al. (2016) compared the measurement results from GMS and MCT, and found snow densities measured by two measurement systems agreed within 9%. Leppänen et al. (2016) reported that the snow density from DMS was lower than that from GMS. Recently, López-Moreno et al (2020) reported that notable differences were observed among the different GMS and suggested that it is necessary to understand the natural variability of snow characteristics and the instrumental and observer induced error before snow density measurement. These previous studies focused on evaluating and comparing the accuracy of different measurement systems in same snowpack condition and analyzing the influence of measuring instrument errors and personnel errors on measurement accuracy. However, relatively few studies have conducted to explicitly evaluate and compare the accuracy of different systems under different snowpack conditions.

Snow crystals undergo different temperature gradient metamorphism growth over time and exhibit different characteristics (Fierz et al. 2009). Having undergone different meteorological conditions, the structure in each layer evolves differently from adjoining layers in terms of grain shape, grain size, inter-granular bonding, density, hardness, wetness and so on. Therefore, snowpack is made up of many snow layers with different physical properties, and snow stratigraphy is constantly changing during a snow cover period. This is especially true in thick snowpack, where stratification boundaries of the snowpack are obvious, and the characteristics of adjacent snow layers are significantly different

(Harper and Bradford, 2003). The change of snow stratigraphy with different physical properties may influence the accuracy and precision of density measurement system used. Selection of proper measurement systems will help to obtain more reliable data and optimize field measurements under the conditions with various snow stratigraphies. Although the existing literature provides an overview of the merits and drawbacks of different measurement systems, tangible guidance on how to make decisions based on measurement system selection in various snow stratigraphies for users is also not clearly provided.

To better understand the performance of different measurement systems under the conditions with various snow stratigraphies, snow-pit measurements were carried out at the Tianshan Station for Snow cover and Avalanche Research (TSSAR) in the winter of 2017/2018. GMS and DMS were applied to measure snow density in various snow stratigraphies. The objectives of this study are to assess (1) whether the same measurement system had similar performance in different snow stratigraphies, and whether two measurement systems provided similar results in the same snow stratigraphy; and (2) whether assimilation of the density data obtained by different measurement systems is feasible. Precision and accuracy as well as merits and drawbacks of two measurement systems in terms of applicability (time and labour needed) were discussed, and recommendations in terms of practicality for field measurement were derived. The result will help field operators to choose more effective and reasonable measurement system based on snowpack characteristics in the field. Meanwhile, assimilation of density data obtained by different measurement systems will allow the data from different measurement systems to be more widely used in international research and contribute to global snowpack databases.

## 2 Data and Methods

### 2.1 Measurement systems of snow density

This study used GMS and DMS to measure the snow density in TSSAR during the winter of 2017/2018. GMS with the 100 cm<sup>3</sup> box-cutter with 6cm×5.5cm×3cm was used in this study (Fig. 1a), which is based on a design originated by the Institute of Low Temperature Science, Japan. The box sampler is a rectangular frame open at both ends. It has a handle on one end. The digital electronic weighing scale (from <http://snowmetrics.com/shop/prosnow-kit-i/>) is plastic, portable and waterproof and measures up to 1000 g at a 0.1g resolution with accuracy of ±0.01g, under an operating environment of −25°C to +40°C. The researchers used a snow shovel to dig a snow pit from the snow

surface to ground level and used a snow saw to obtain a profile of snowpack in the observation field.

The weighing scale was then placed on a flat surface and zeroed. The cutter pushed horizontally into the target layer being measured to collect the sample, and all snow was cleaned from the outside of the sampler. The snow sample was extracted and put in a plastic bag, and then put the sample on the weighing scale and recorded weight data.

DMS has widely been used in many studies (Tiuri and Sihvola, 1986; Harper and Bradford, 2003; Sugiyama et al., 2010; Techel and Pielmeier, 2011). The Snow Fork, as a representative of DMS, has been applied to measure snow density in this study (Fig. 1b). The Snow Fork is designed to operate in extreme conditions with temperatures low to  $-25^{\circ}\text{C}$  (Toikka, 2009). As a portable instrument, the Snow Fork consists of an electronics box, a sensor, a keyboard and rechargeable batteries. It probes samples of snow within a cylindrical volume of about  $2 \times 7.5 \text{ cm}$  and operates between 500 and 1000 MHz. The sensor of the Snow Fork is a steel fork used as a microwave resonator. Resonant frequency, attenuation, and 3-dB bandwidth are measured by the Snow Fork, and the results are used to accurately calculate snow density ( $\rho$ ) and liquid water content (LWC) (see Appendix). The details of instrument operation can be found at <https://toikkaoy.com/>.

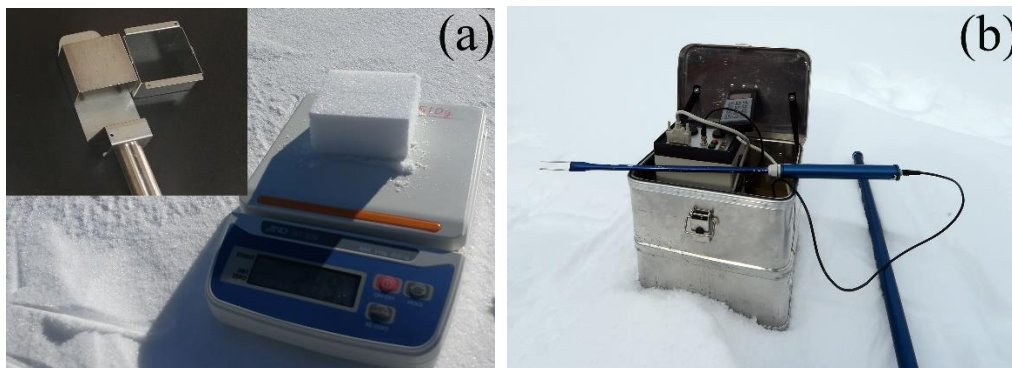

**Figure 1.** Snow density measurement systems used in the study: (a) gravimetric measurement system (the  $100 \text{ cm}^3$  box-cutter and the weighing scale), (b) dielectric permittivity measurement system (the Snow Fork).

## 2.2 Stratigraphy and mechanical properties of snow

Snowpack is made up of many snow layers with different physical properties. A stratigraphic layer is a certain stratum with similar properties (size of the grains, microstructure, shear strength, and hardness) in the snowpack according to Fierz et al. (2009). An overview of the methods which were used to measure these snow properties is described as follows.

Snow depth was the measurement of the vertical length of snow from ground to snow surface. The

ground was taken as reference datum and recorded as 0 cm, and the vertical length from the ground to  
150 the snow surface was recorded as the snow depth. Snow rulers were used to measure snow depth. We  
also used a brush to gently remove snow from the profiles, then examined the snow crystal diameter  
with the aid of snow crystal screen which has two grids of 1 and 2mm under an 8 or 10×magnifier.

Shear strength is one of the fundamental mechanical properties of snow, which is the strength of  
snow against yield (Mellor, 1975; Nakamura et al., 2010). The shear strength of snow is determined by  
155 microstructure and reflects the bond strength between the snow particles. The shear frame system is  
usually used to measure the shear strength of snow (Mellor, 1975; Nakamura et al., 2010). The  
measurement system consists of two parts: a shear frame with area of 0.025 m<sup>2</sup> and the attached force  
gauges with full load capacity of 100 N (Fig. 2a) (Jamieson and Johnston, 2001, 2007; Abe et al., 2006).  
Overlying snow was removed, leaving about 40mm of undisturbed snow above the measured snow  
160 layer. The shear frame was inserted onto the target snow layer and manually pulled smoothly and  
quickly to ensure fracturing of target snow layer. The shear strength is obtained by dividing the force  
gauges data by effective shear area. In this study, the shear strength of the measured layer was  
estimated by the shear strength from 12 shear measurements (Jamieson and Johnston, 2001, 2007; Abe  
et al., 2006; Nakamura et al., 2010).

165 Snow hardness indicates an ability of resistance to penetration or the pressure required for  
penetration of snow (Pielmeier and Schneebeli, 2003). The higher the hardness, the smaller the  
compressibility. Snow hardness was measured with the push-pull gauge with full load capacity of 100  
N at observation sites (Fig. 2b). The attachment of the push-pull gauge was penetrated horizontally into  
the snow profile at a uniform speed. When snow was completely covered with the attachment, the dial  
170 readings were recorded. The snow hardness value  $PR_{15}$  is the recorded data divided by the area of the  
attachment, and the unit of  $PR_{15}$  is Kpa. In this study, the hardness of the measured layer was estimated  
by the hardness from 12 hardness measurements (Takeuchi et al., 1998).

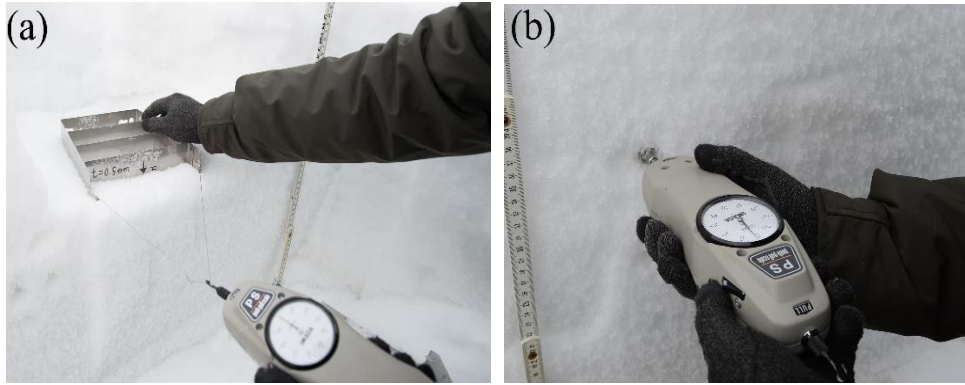

**Figure 2.** The measurements of snow mechanical properties: (a) snow shear strength measurement  
(b) snow hardness measurement.

### 2.3 Field experiment design

To investigate the performance of two measurement systems in different snow stratigraphies, snow density data measured on different snow stratigraphical profiles by two measurement systems were collected. Data for analysis were collected in the observation field of the TSSAR. Established in 1967, the TSSAR (43°16' N, 84°24' E) with an elevation of 1776m above sea level is located in the upstream branch of the Künes River basin in the mid-mountain zone of the Tianshan Mountains. Geomorphological setting and the climate of TSSAR were described by others in published literature (Lu et al., 2016; Hao et al., 2018).

In order to obtain snow density data within various stratigraphies, the experiment was carried out during different periods when the snow stratigraphy was significantly different. Based on the liquid water content in snow, snow was divided into two types: wet snow and dry snow. Wet snow was defined as snow with volumetric liquid water content greater than 3%, which was characterized by the fact that water can be recognized at 10× magnification by its meniscus between the grains (Fierz et al., 2009). Wet snow indicates that water will likely percolate through the snow since the transition from the pendular to the funicular regime starts at a liquid water content of 3% (Denoth, 1980; Techel and Pielmeier, 2012). If the volumetric liquid water content in snow is less than 3%, snow is defined as dry snow. The experiment was first conducted on January 20<sup>th</sup>-21<sup>st</sup>, 2018, with the average air temperature of -7.6°C, which represents a period of dry snowpack conditions. The depth of the snowpack was 55cm with the liquid water content ranging from 0 to 0.45% due to solar radiation reaching on the surface of the snowpack. The snowpack crystals consisted of decomposing and fragmented precipitation particles (DF) with 25%, faceted crystals (FC) particles with 33% and depth hoar (DH) particles with 42%.

According to Fierz et al. (2009) and Techel and Pielmeier (2011), there were more high temperature gradient metamorphism grains (snow class FC, DH) than low temperature gradient metamorphism grains (snow class DF) in the snowpack. The experiment was performed again on March 10<sup>th</sup>, 2018, with the average air temperature of -0.7°C, which represents a period of wet snowpack conditions. The depth and liquid water content of snowpack were 42cm and 3.0~6.0%, respectively, and the snowpack crystals consisted of DH with 8% and MF with 92%. Before implementing each density measurement experiment, a rectangular snow-pit was excavated in a previously undisturbed location and all measurements were made on a shaded side-wall of the snow-pit. The same experienced individuals took all samples and measurements.

**Measurements in dry and wet snowpack:** To compare the performance of two measurement systems in the same snowpack, whole dry snow layer density data were collected on January 20<sup>th</sup>, 2018. The sampling was performed from the snow surface to ground at intervals of 30 mm and snow density was measured (Fig. 3a). The average density value of eighteen snow blocks from the snow surface to ground was calculated as the density of whole snow layer. The middle position of cutter snow sampling corresponded to the points of the Snow Fork in order to compare the density from two measurement systems at the same level (Fig.3a). After one measurement of density within a whole snow layer, the observation position moved horizontally to next one. The density measurement of the whole snow layer was repeated with 20 times. Density data of whole wet snow layer by two measurement systems were collected on 10 March 2018. The same experimental method for measuring whole dry snow layer density was used to measure the whole wet snow layer density (3b). The average value of 14 snow blocks density from the snow surface to ground was calculated as the density of whole wet snow layer.

**Measurements within various snow stratigraphies:** To investigate the performance of the same measurement system in different snow stratigraphies and compare the performance of two measurement systems in various snow stratigraphies, the density data measured on different dry snow stratigraphical profiles by two measurement systems were collected on 21 January 2018. The shape and size of grain, and the depth of snow layers were first measured. After the stratigraphic arrangement of the snowpack was identified (Table 1), the middle position of the given snow layer was considered to be the target location for measuring snow density (Fig. 3c, 3d). Density measurements were made in the DF, FC, DH and MF snow layers by two measurement systems and repeated with 25 times. Shear strength and hardness of each layer were measured separately after the density measurements were



completed. Similarly, density, shear strength and hardness of the MF snow layer were measured on 10 March 2018.

230

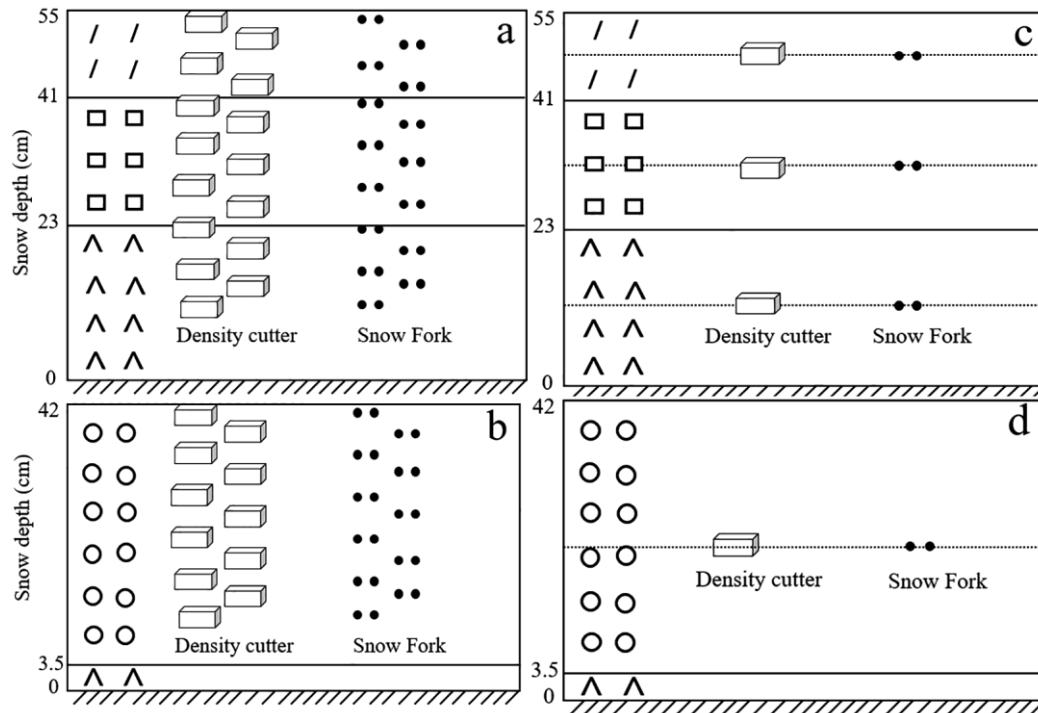

**Figure 3.** Schematic diagram showing the gravimetric measurement system (box-cutter) and dielectric permittivity measurement system (Snow Fork) density measurements. (a) and (b): density measurement of the whole snow layer from the snow surface to ground. Intervals of the measurements in the vertical direction are 30 mm. (c) and (d): density measurement of snow layer made up of the same type of grain. The slashes, hollow block triangular brackets and hollow circle represent DF, FC, DH and MF.

235

**Table 1.** Summary of sample layer characteristics and measurements.

| Snow layer | Grain shape | Layer thickness<br>(cm) | Size of grain<br>(mm) | Liquid water<br>content (%) | Data            | Number of<br>samples |
|------------|-------------|-------------------------|-----------------------|-----------------------------|-----------------|----------------------|
| 1          | DF          | 14                      | 0.2~1                 | 0~0.4%                      | 21 January 2018 | 25                   |
| 2          | FC          | 18                      | 1~2                   | 0                           | 21 January 2018 | 25                   |
| 3          | DH          | 23                      | 2~4                   | 0                           | 21 January 2018 | 25                   |
| 4          | MF          | 38                      | 1~3                   | 3.0%~4.5%                   | 10 March 2018   | 25                   |

## 2.4 Data analyses

The accuracy of a measurement system is the degree of closeness of measurements of a quantity to that quantity's true value (ISO, 1994). The average density from GMS was defined as the reference

240

true value in this study and was formulated by equation (1). Relative error (RE) and average relative error (ARE) were used to assess the accuracy of measurement system and formulated by equation (2) and (3).

$$\bar{x} = \frac{1}{n} \sum_{i=1}^n x_i \quad (1)$$

$$RE = \frac{x_i - \bar{x}}{\bar{x}} \times 100\% \quad (2)$$

$$ARE = \frac{|RE|}{n} \quad (3)$$

Where  $\bar{x}$  denotes the average of all samples,  $x_i$  is the density of the  $i^{\text{th}}$  sample,  $n$  is the total number of samples. The precision of a measurement system, related to reproducibility and repeatability, is the degree to which repeated measurements under unchanged conditions show the same results.

Relative standard deviation (RSD) was used to assess the precision of each measurement system and formulated by equation (4). The smaller RSD, the higher the precision of a measurement system.

$$RSD = \frac{1}{\bar{x}} \sqrt{\frac{\sum_{i=1}^n (x_i - \bar{x})^2}{(n-1)}} \times 100\% \quad (4)$$

Measurement uncertainty was a parameter characterizing the dispersion of the values attributed to a measured quantity. The higher the uncertainty, the lower the credibility and application value of data (BIPM et al., 2008). In this study, to evaluate measure uncertainty, the uncertainty ( $\mu_A$ ) was calculated according to the following formula (Elster, 2007; BIPM et al, 2008):

$$\mu_A = \sqrt{\frac{\sum_{i=1}^n (x_i - \bar{x})^2}{n(n-1)}} \quad (5)$$

All statistical computations were implemented with statistical software (IBM SPSS Statistics 21).

RE, ARE, RSD and  $\mu_A$  were calculated for accuracy and precision of two measurement systems used.

The Levene's test was performed to verify departures from basic assumptions of variance and normality. A 1-way ANOVA was conducted to assess the overall statistical significance of differences among the measure groups ( $\alpha=0.05$ ).

### 3 Results

#### 3.1 Density measurements by gravimetric measurement system (GMS) in various snow

The profiles of dry snow density obtained from GMS are shown in Fig. 4(a). The density of DH layer (0-23cm) was greater than that of DF and FC layers (23-55cm) (Fig. 4(a)). For 23-55cm snow layers, the density of the ice layer (40-41cm) between DF and FC layers was higher than that in other parts of the snow profile. The density of newly formed DH layer (21-23cm) was much lower than that of other parts of snow in the DH layer. The wet snow density profiles of GMS are shown in Fig 4(b). The density of snow from the 12cm to 18cm layer with liquid water content of 5%-6% was higher than that from other layers. The results of measurement error and uncertainty in Table 2 suggested that ARE and RSD of dry snow from GMS were higher than that of wet snow, which indicated that GMS has more accurate and precision in dry snow than that in wet snow.

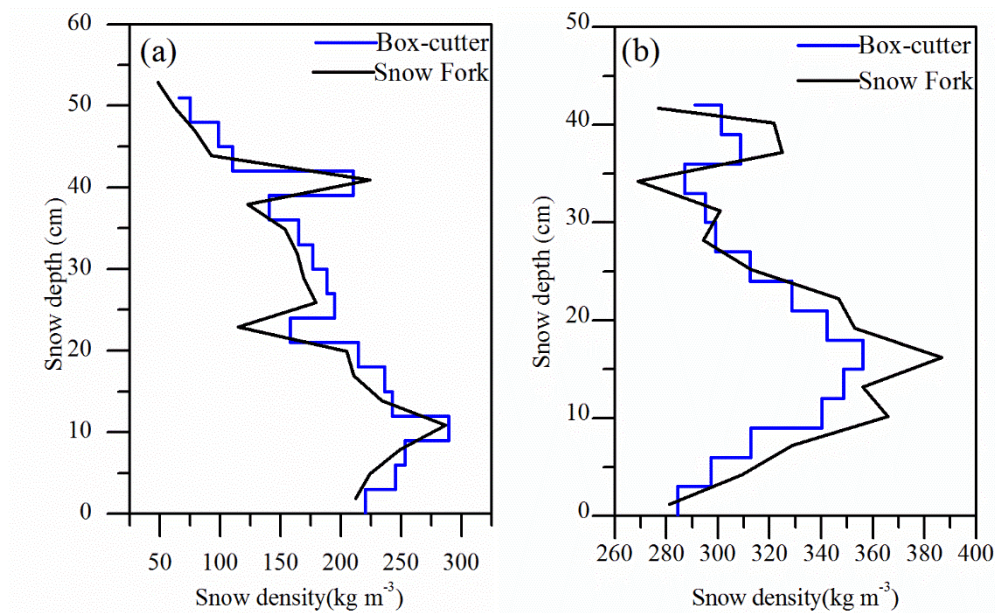

**Figure 4.** Density profile measured by gravimetric measurement system (box-cutter) and dielectric permittivity measurement system (Snow Fork): (a) dry snow density data; (b) wet snow density data.

**Table 2.** Result summary of experimental measurement using GMS (box-cutter) in field. RE, relative error; ARE, average relative error; RSD, relative standard deviation;  $\mu_A$ , the uncertainty.

| Measurement system             | Snow type | Layer mean density (kg/m <sup>3</sup> ) | RE (%) | ARE (%) | RSD (%) | $\mu_A$ (kg/m <sup>3</sup> ) |
|--------------------------------|-----------|-----------------------------------------|--------|---------|---------|------------------------------|
| Gravimetric measurement system | Dry snow  | 187.3                                   | -6~8   | 3.1     | 3.6     | 1.5                          |
|                                | Wet snow  | 311.5                                   | -4~5   | 2.3     | 2.7     | 1.9                          |
|                                | DF        | 93.5                                    | -8~10  | 4.2     | 4.9     | 0.9                          |
|                                | FC        | 177.3                                   | -4~6   | 2.9     | 3.4     | 1.2                          |
|                                | DH        | 236.8                                   | -4~3   | 2.1     | 3.2     | 1.6                          |

|    |       |      |     |     |     |
|----|-------|------|-----|-----|-----|
| MF | 304.9 | -6~7 | 2.8 | 3.3 | 2.0 |
|----|-------|------|-----|-----|-----|

The density measured by GMS in Table 2 suggested that ARE and RSD of measured density in different snow stratigraphies were significantly different ( $P < 0.05$ ). GMS showed the highest accuracy in the DH, with a RE of  $-4\% \sim 3\%$ , and an ARE of 2.1%. ARE of measured density in DF layer were 4.2%, which was 2 times higher than that in DH layer. The order of RSD and ARE were as follows:  $DF > FC > MF > DH$ , which indicated that the accuracy and precision of GMS using the box-cutter were found to be:  $DF < FC < MF < DH$ .

### 3.2 Density measurements by dielectric permittivity measurement system (DMS) in various snow stratigraphies

Fig. 4 showed that the profiles of snow density in same snowpack from DMS were similar to that from the GMS, but snow density measured was significantly different ( $P < 0.05$ ). The mean density from DMS was 9% and -3% lower than that from GMS in dry and wet snowpack, expressed as percentage of the mean density from GMS. Table 3 showed that ARE and RSD of measured density of wet snow from DMS were lower than that of dry snow, which indicated that DMS was more accurate and precise in wet snow than that in dry snow. Compared with GMS, DMS had relatively higher ARE and RSD in the same snowpack (Table 2 and Table 3).

ARE and RSD of density measured by DMS were significantly different ( $P < 0.05$ ) in different snow layers. For different snow layers, ARE of measured density in DF layer was 24.4%, which was about 7.6 times higher than that in MF layer. RSD of measured density in DF layer was 28.0%, which was 6.7 times higher than that in MF layer. The order of ARE and RSD of measured density was as follows:  $DF > FC > DH > MF$  (Table 3), which indicated that the accuracy and precision of DMS were as follows:  $DF < DH < FC < MF$  (Table 3). Compared with the density from GMS, the density from DMS was relatively high in DF, FC and DH layers (Table 2 and Table 3). In contrast, the density in MF layer from DMS was higher than that from GMS using the box-cutter. The snow density from GMS and DMS showed the largest difference in DF layer, and the smallest difference in MF layer. Compared with GMS, DMS had relatively poor accuracy and precision in all four snow layers.

**Table 3.** Result summary of experimental measurements using dielectric permittivity measurement system (the Snow Fork) in field. RE, relative error; ARE, average relative error; RSD, relative standard deviation;  $\mu_A$ , the uncertainty. RE, ARE and RSD are expressed in % of the mean density from

box-cutter group.

| Measurement system                         | Snow type | Layer mean density (kg/m <sup>3</sup> ) | RE (%)   | ARE (%) | RSD (%) | $\mu_A$ (kg/m <sup>3</sup> ) |
|--------------------------------------------|-----------|-----------------------------------------|----------|---------|---------|------------------------------|
|                                            | Dry snow  | 169.4                                   | -16~2    | 9.4     | 9.6     | 4.8                          |
| Dielectric permittivity measurement system | Wet snow  | 320.2                                   | -4.5~6.1 | 4.2     | 4.8     | 4.0                          |
|                                            | DF        | 68.7                                    | -49~-4   | 24.4    | 28.0    | 5.6                          |
|                                            | FC        | 168.3                                   | -16~5    | 5.5     | 7.0     | 2.6                          |
|                                            | DH        | 224.3                                   | -8~3     | 4.3     | 6.5     | 3.2                          |
|                                            | MF        | 311.3                                   | -8~9     | 3.2     | 4.2     | 2.6                          |

## 4 Discussion

### 4.1 Performance of gravimetric measurement system (GMS) and error analysis

Natural snowpack develops from a series of winter snowfall and contains many layers with different characteristics (Sturm et al., 2002; Kärkäs et al., 2005). This study analyzed experiments in which the same measurement system was used to measure the density of the different snow stratigraphies to assess whether the same measurement system had similar performance in different snow stratigraphies. Field experimental results showed that the same measurement system had significantly different accuracy and precision in various snow stratigraphies (Table 2). For different snow stratigraphies in dry snow, the accuracy and precision of GMS showed as follows: DF < FC < DH. GMS had poor accuracy in lower density snow layers, which was in agreement with findings by Conger and McClung (2009), i.e. the accuracy of GMS with 100cm<sup>3</sup> box-cutter in high density snowpack was higher than that in low density snowpack. Carrol (1977) and Proksch et al. (2016) also reported that GMS had poor accuracy and tends to overestimate density for lower density snow.

Snow has characteristics of easy compression and deformation (Sturm and Holmgren, 1998). Snow samples are compressed and sheared by the cutter and cover in the process of sampling, which can cause the densification of snow samples. This may result in density being overestimated. The degree of compression deformation of the snow sample is affected by the force and velocity of the thrust of the box cutter into the snow. The force and speed of propulsion cannot be constant in each measurement in the field. Therefore, snow with greater compressibility is more susceptible to artificial manipulation, resulting in GMS having high system error and measurement uncertainty. A similar conclusion was reached by Hawley et al. (2008) who reported that unconsolidated snow near the snow surface affects the accuracy measurement of GMS, but Hawley et al. (2008) did not further discuss and explain the reasons in detail.

It is difficult to quantify the compressibility of snow in the field, so we use hardness as an indicator (Pielmeier and Schneebeli, 2003). Snow compressibility decreases with the increase of the hardness (Kaur and Satyawali, 2017). Experimental observations found the hardness of snow layer in the following order: DH ( $92.0\text{Kpa} \pm 7\%$ ) > FC ( $14\text{Kpa} \pm 21\%$ ) > DF ( $4.9\text{Kpa} \pm 40\%$ ) in dry snow (Fig. 5a).

This result can be explained by the fact that compressibility decreases with the increase of the size of grain and density in dry snow (Sturm and Holmgren, 1998; Kaur and Satyawali, 2017). Fig. 5b showed the shear strength of snow layer in the following order: DH ( $575\text{Pa} \pm 9\%$ ) > FC ( $275\text{Pa} \pm 14\%$ ) > DF ( $137\text{Pa} \pm 27\%$ ) in dry snow, which can be explained by the fact that the shear strength of snow was higher when snow density is greater in dry snow (Abe and other, 2006). DF layer was located at the top of the whole snow layer (Fig. 3) and had low temperature gradient metamorphism grains (Fierz et al., 2009; Techel and Pielmeier, 2011) with low density and small grain size (Table 1). Low density and small grain size of DF layer caused low shear strength and high compressibility (Fig. 5a), resulting in high susceptibility to compressive deformation and shear failure from external force. The degree of compressive deformation and shear failure varied greatly with each measurement for DF layer due to low shear strength and hardness, so that measured density values showed high disparity and dispersion. Therefore, the poorest accuracy and precision of GMS was found in DF layer. DH layer was located at the bottom of the whole snow layer, and its density and size of grain were the largest (Table 1). High density and large gain size of DH layer caused high shear strength and low compressibility with low variation, resulting in measured density values with relatively low disparity and dispersion. Across the four dry snow layers, GMS showed the highest accuracy and precision in DH layer due to high shear strength and low compressibility which is a characteristic of DH layer. From the short review above, the accuracy and precision of GMS showed increased tendencies with increasing density and size of grain of snow, and the accuracy and precision of GMS showed as follows: DF < FC < DH in dry snow.

In contrast, the density of MF layer was higher than that of DH layer, but the accuracy and precision of GMS in MF layer were lower than that in DH layer (Table 2 and Table 3). MF layer had isothermal gradient metamorphism grains (Fierz et al. 2009), and the liquid water content of MF layer was  $3.0\% \sim 4.5\%$  (Table 3). The shear strength of snow showed decreasing tendencies with the increase of liquid water content (Yamanoi and Endo, 2002). Although the density of MF layer was higher than that of DH layer, experimental observation found the shear strength and hardness of MF layer were lower than that of DH layer (Fig. 5). This result can be explained by the fact that the accuracy and

precision of GMS in MF layer were lower than that in DH layer. In summary, the density, liquid water content, and the size of grain of four different snow layers caused the decrease hardness and shear strength of the snow layers in the following order: DH > MF > FC > DF (Fig. 5), which led to the reduced accuracy and precision of GMS in the same order. However, the study also found that GMS showed relatively low accuracy and precision in the ice layers and the bottom depth hoar layer which had relatively high density, which was in agreement with findings by López-Moreno et al (2020), who found that relative errors was high in ice layers or snowpack impacted by heavily wind. Because ice layers and the bottom depth hoar have high shear strength and hardness, box-cutter and cover of GMS had difficulty to cut snow and a part of the snow sample was lost in the course of sampling.

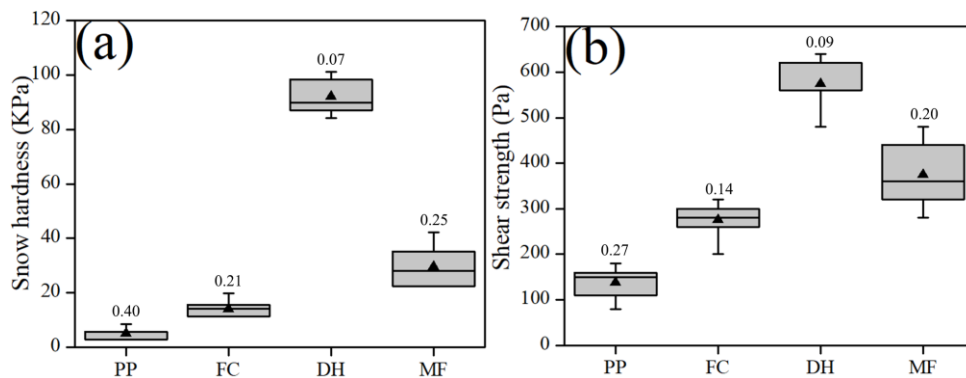

**Figure 5.** The mechanical properties of the target snow layer: (a) the hardness of the target snow layer; (b) the shear strength of the target snow layer. Boxes represent interquartile ranges (25th to 75th percentiles), thick horizontal bars in each box denotes the median (50th percentile), Whiskers (vertical lines and thin horizontal bars) represent the highest and lowest value within 1.5 times the interquartile range above the upper or below the lower quartile, respectively. Black small triangle denotes the average values. The number above each box is the coefficient of variation among repeated measurements.

#### 4.2 Performance of dielectric permittivity measurement system (DMS) and error analysis

The accuracy and precision of DMS in low density snow (snow class DF) were lower than that in high density snow (snow class FC, DH and MF) (Table 3). In terms of the accuracy of DMS, a similar result was showed by Hawley et al. (2008) who found RE up to 20% in the lower-density sections and 10–13% in the higher-density sections for DMS. Therefore, DMS was extremely unstable in low density snow. There are several other interesting facts worth of discussing based on the findings of the field experiment. Hawley et al. (2008) pointed out that low density snow had a bigger air gap between

the grains resulting in unstable capacitance readings. Sugiyama et al. (2010) reported that the structure of snow affected the stability of dielectric signals and the permittivity of unconsolidated snow was smaller than that of compacted snow. However, they did not consider how the damage of the resonator to the snow structure would affect the accuracy and precision of DMS. Snow sampling was not compressed in DMS measurement, but snow structure was damaged when the resonator was inserted horizontally into the snow profile. The destruction resistance capability of snow affected the accuracy and precision of DMS. Disparity and dispersion of the measured value increased with the increasing degree of damage to the snow structure from the resonator. Because low density snow (snow class DF) had relatively low destruction resistance capability due to low shear strength and hardness (Fig. 5), DMS showed poor accuracy and precision in low density snow. In contrast, although the destruction resistant capability of MF layer was lower than that of DH layer, the accuracy and precision of the measurement system in MF layer were slightly higher than that in DH layer. The air gap between the grains in the MF layer is smaller than that in DH layer due to the existence of liquid water filling in the gap between the grains in MF layer, which results in relatively low variation of dielectric signals of DMS in MF layer when the resonator was inserted into the snow. Relatively stable dielectric signals of DMS in MF layer cause that the accuracy and precision of DMS in MF layer were slightly higher than that in DH layer. Temperature of the snow layer and sand-dust in snowpack also affect the dielectric permittivity of snow (Fujita et al., 1992; Dong et al., 2014). There were significant differences in temperature and sand-dust between snow layers. Because of the lack of conditions for measuring temperature and sand-dust within snowpack under field conditions, we did not take the effect of temperature and sand-dust on accuracy and precision of DMS into consideration. Understanding the effects of these factors on density measurement would be worthwhile in future research projects.

### 4.3 Comparison of two measurement systems

There was significant difference in the snow density observed from two measurement systems, and the difference varied with changes in snowpack characteristics. The mean density measured by DMS was 9% lower than that by GMS in dry snow, expressed as percentage of the mean of density from GMS, which is similar to the report by Leppänen et al. (2016). The density of DF, FC and DH layers from GMS overestimated that from DMS by 26.5%, 5.1%, and 5.3%, expressed as percentage of the mean of density from GMS (Table 3). The density differences between two measurement systems decreased with the increase in density. For the wet snowpack, the density from GMS was slightly lower



than that from DMS (Table 2 and Table 3). The density from the DMS overestimated that from GMS measurement system by 2% in MF layer, expressed as percentage of the mean of density from GMS (Table 2 and Table 3). From what has been discussed above, DMS appeared to underestimate snow density in the dry-low density sections with respect to GMS but agreed with or slightly overestimated the wet-high density sections.

The accuracy and precision of GMS and DMS showed lower accuracy and precision in low density snow (snow class DF) due to lower shear strength and hardness of lower-density snow. The difference in the accuracy and precision of two measurement systems showed decreasing tendencies with increasing density. Compared with GMS, DMS showed very poor accuracy and precision. The weight of GMS (box-cutter, flat shovel and balance scales) was lighter than that of DMS (the Snow Fork) (Table 4). GMS was also easier for surveyors to carry in the cold environment. Although GMS may cause some errors as some of snow escaped from the sampler or stayed in the sampler during the transfer from sampler to weighing scales, these error sources are minimized by carefully cleaning the sampler and weighing scales during the measurements. Based on the above analysis, GMS was more suitable for field snow density measurement than DMS. However, the vertical resolution of DMS in the millimeter range was clearly a significant advantage on the centimeter resolution of GMS with the box-cutter (Table 4). GMS was usually insufficient to resolve the small-scale spatial fluctuations in density so it may not meet the needs of some research. Measurement of DMS had less time than that GMS did in the cold environment. The surveyor needed an assistant to record data during GMS measurement, but DMS could automatically save data (Table 4). The most remarkable advantage of DMS over GMS was that DMS can measure density and obtain liquid water content in snowpack at the same time in the wet snowpack.

**Table 4.** Vertical resolution and weight of gravimetric measurement system (GMS) and dielectric permittivity measurement system (DMS). Measurement time in the field is per meter of snow depth and includes digging a snow pit.

| Measurement system  | Vertical resolution<br>(mm) | Weight<br>(kg) | Measurement time | Cost<br>(US dollar) | Data record       |
|---------------------|-----------------------------|----------------|------------------|---------------------|-------------------|
| GMS (Box-cutter)    | 30                          | 1.3            | 60min            | 20                  | Manual records    |
| DMS (The Snow Fork) | 3                           | 21.0           | 40min            | 14500               | Automatic records |

Different measurement systems might be used in field snow measurement due to different study conditions, such as labour needs, data requirements, and different research teams and institutions.

Therefore, it was difficult to build a unified and optimized snow global database. Assimilation of the  
 450 data obtained by different measurement systems provided an effective way to solve the above problem.  
 The correlation of the density from GMS ( $\rho_b$ ) with the density from DMS ( $\rho_s$ ) at the same snowpack  
 was investigated in the dry and wet snow (Fig. 6). Least-squares linear regression gave the coefficients  
 of the relationship

$$\rho_b = a\rho_s^2 + b\rho_s \quad (6)$$

455 As  $a = -0.11 \times 10^{-2}$  and  $b = 130.75 \times 10^{-2}$  in the dry snow (Fig. 6a), and as  $a = -0.07 \times 10^{-2}$  and  $b =$   
 $123.8 \times 10^{-2}$  in the wet snow (Fig. 6b).

The density from GMS was greater than that from DMS in the dry snowpack, whereas the density  
 from DMS tended to underestimate low densities and overestimate high densities with respect to the  
 density from GMS, with a threshold of  $318 \text{ kg m}^{-3}$  in the wet snowpack (Fig. 6b).

460 The correlation of the density from GMS and DMS at the same snowpack was investigated using  
 all the data obtained from this study (Fig. 7). Least-squares linear regression gives the coefficients of  
 the relationship as  $a = -0.08 \times 10^{-2}$  and  $b = 126.13 \times 10^{-2}$  with  $R^2 = 0.97$ .

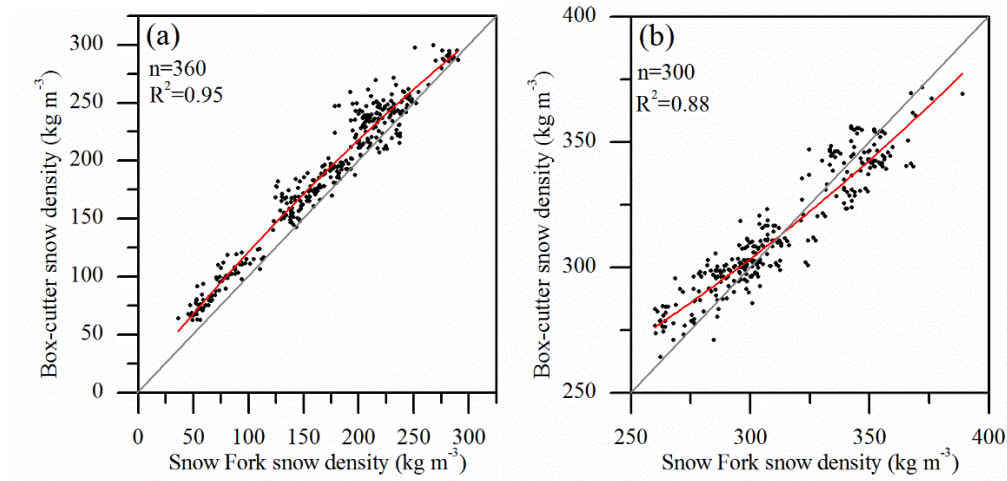

465 **Figure 6.** Gravimetric measurement system(box-cutter) vs dielectric permittivity measurement system (Snow Fork). The lines correspond to the linear regression of the two datasets (a) dry snow; (b) wet snow.

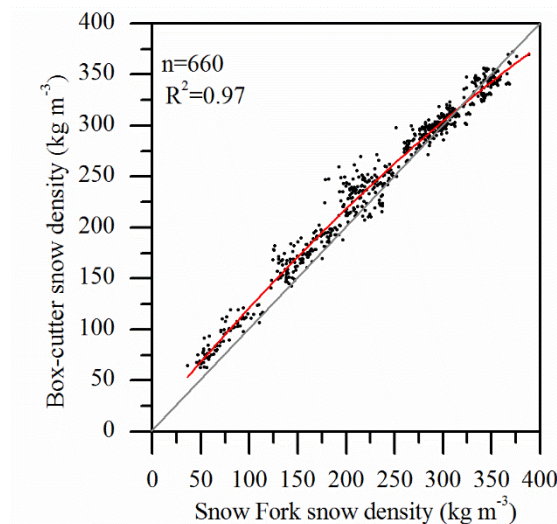

**Figure 7.** Plots of all the data on gravimetric measurement system(box-cutter) vs dielectric permittivity measurement system (Snow Fork). The lines correspond to the linear regression of the two datasets.

## 5 Conclusions

This study compared snow density measured by gravimetric measurement system with 100cm<sup>3</sup> box-cutter and dielectric permittivity measurement system with Snow Fork in the TSSAR in the winter of 2017-2018. The results showed that the snow density from two measurement systems was significantly different in the same snowpack. The snow density from dielectric permittivity measurement system tended to underestimate dry-low density and overestimate wet-high density with respect to the snow density from gravimetric measurement system. The density in layers consisting of low temperature gradient metamorphism grains (snow class DF) was more frequently falsely estimated than that in layers consisting of high temperature gradient metamorphism grains (snow class FC, DH) or isothermal gradient metamorphism grains (snow class MF) in two measurement systems.

The accuracy and precision of density measurement systems are critical for experiments and observations of snow. Each system for density measurement has its own advantages and limitations. Two measurement systems showed poor accuracy and precision in low-density dry snow. Both measurement systems need further refinement for use on low density dry snow (snow class DF). Compared with gravimetric measurement system, dielectric permittivity measurement system showed very poor accuracy and precision. Although gravimetric measurement system is generally a more reliable method for density measurement, its resolution is low and its damage to snow profile is more serious than dielectric permittivity measurement system. Furthermore, there was a slight difference between the densities from dielectric permittivity measurement system and gravimetric measurement

system in wet snowpack, and dielectric permittivity measurement system can obtain liquid water content data while measuring density. Considering the accuracy, cost, labour needs, and data requirements, the study results suggest snow surveyors use gravimetric measurement system during dry snow and dielectric permittivity measurement system during wet snow during the investigation of snow characteristics. This will help surveyors obtain more reliable data and optimize field measurements.

Our study could provide an approach which will aid researchers in assimilating data from different studies with different measurement systems and integrating the data from single studies into larger databases. However, the lack of data from other measurement systems (  $\mu$  CT, neutron-scattering probe, other type cutters, etc) makes it difficult to compare and evaluate the performance of other measurement systems across the different snow stratigraphies. The data collection from other measurement systems can help to build a better data assimilation scheme in the future.

*Acknowledgements.* This work was supported by the National Project of Investigation of Basic Resources for Science and Technology (Grant No. 2017FY100501), the National Natural Science Foundation of China (NSFC Grant U1703241) and CAS Instrumental development project of Automatic Meteorological Observation System with Multifunctional Modularization. We are grateful to the supports in field and laboratory work from the Tianshan Station for Snow Cover and Avalanche Research, Chinese Academy of Sciences.

*Author Contributions:* Jiansheng Hao conceived and designed the study, and wrote the paper. Jiansheng Hao, Farong Huang, Ditao Chen performed the experiments. Lanhai Li and Shuyong Mu contributed to discussions and revisions.

*Conflicts of Interest:* The authors declare that they have no conflict of interest.

*Data availability statement:* The data related to this article is available online at <https://doi.org/10.5194/gi-2020-14-supplement>.

## Appendix

Snow density ( $\rho$ ) and liquid water content (LWC) were accurately measured by the Snow Fork. The resonant frequency, attenuation and 3 dB band measured by the Snow Fork are inserted into Eq. (7, 8, 9), which are used to calculate real( $\epsilon'$ ) and imaginary ( $\epsilon''$ ) parts of permittivity.

$$B_{air} = 0.04(f - 400) \quad (7)$$

$$\varepsilon' = \left(\frac{f_{air}}{f}\right)^2 \quad (8)$$

$$\varepsilon'' = \frac{B - B_{air}}{f \varepsilon'} \quad (9)$$

where  $f$  is the resonant frequency (GHz). The resonant frequency, real and imaginary parts of permittivity are obtained, and  $k$  is a constant ( $k=1.2142857$ ). They inserted into Eq (10, 11), which are used to derive LWC and  $\rho$  through real and imaginary parts of permittivity.

$$LWC = -0.06 + \sqrt{(0.06)^2 + \frac{\varepsilon''}{0.0075f}} \quad (10)$$

$$\rho = -k + \sqrt{k - \frac{1 + 8.7LWC + 70LWC^2 - \varepsilon'}{0.7}} + LWC \quad (11)$$

## References

- Abe, O., Xu, J. R., Liu, J., Hirashima, Y., Mochizuki, S., Yamaguchi, S., Sato, T., and Sato, A.: Shear strength of natural and artificial depth hoar layers, in: Proceedings, Marmot, CO, 7-14, 2006.
- Barnett, T. P., Adam, J. C., and Lettenmaier, D. P.: Potential impacts of a warming climate on water availability in snow-dominated regions, *Nature*, 438, 303-309, 2005.
- BIPM, IEC, IFCC, ISO, IUPAC, IUPAP, and OIML: Evaluation of measure data guide to the expression of uncertainty in measure JCGM 100:2008, BIPM Joint Committee for Guides in Metrology, Paris, 2008.
- Bormann, K. J., Westra, S., Evans, J. P., and McCabe, M. F.: Spatial and temporal variability in seasonal snow density, *J. Hydrol.*, 484, 63-73, <https://doi.org/10.1016/j.jhydrol.2013.01.032>, 2013.
- Brun, E., Martin, E., Simon, V., Gendre, C., Coleou, C.: An energy and mass model of snow cover suitable for operational avalanche forecasting, *J. Glaciol.*, 35, 333-342, 1989.
- Calonne, N., Flin, F., Morin, S., Lesaffre, B., Rolland du Roscoat, S., and Geindreau, C.: Numerical and experimental investigations of the effective thermal conductivity of snow, *Geophys. Res. Lett.*, 38, L23501, <https://doi.org/10.1029/2011GL049234>, 2011.
- Calonne, N., Geindreau, C., Flin, F., Morin, S., Lesaffre, B., Rolland du Roscoat, S., and Charrier, P.: 3-D image-based numerical computations of snow permeability: links to specific surface area, density, and microstructural anisotropy, *The Cryosphere*, 6, 939-951, <https://doi.org/10.5194/tc-6-939-2012>, 2012.
- Carroll, T.: A comparison of the CRREL 500 cm<sup>3</sup> tube and the ILTS 200 and 100 cm<sup>3</sup> box cutters used for determining snow densities, *J. Glaciol.*, 18, 334-337, 1977.
- Conger, S. M. and McClung, D.: Instruments and Methods: Comparison of density cutters for snow profile observations, *J. Glaciol.*, 55, 163-169, <https://doi.org/10.3189/002214309788609038>, 2009.
- De Michele, C., Avanzi, F., Ghezzi, A., and Jommi, C.: Investigating the dynamics of bulk snow density in dry and wet conditions using a one-dimensional model, *The Cryosphere*, 7, 433-444, <https://doi.org/10.5194/tc-7-433-2013>, 2013.

Denoth, A.: The Pendular-Funicular Liquid Transition in Snow, *J. Glaciol.*, 25(91), 93-98, 1980.

Dong, Q. F., Li, Y. L., Xu, J. D., Zhang, H., and Wang, M. J.: Effect of sand and dust storms on microwave propagation, *IEEE Trans. Antennas Propag.*, 61, 910-916, 2013.

Elster, C.: Calculation of uncertainty in the presence of prior knowledge, *Metrologia*, 44(2), 111, 2007.

560 Fierz, C., Armstrong, R., Durand, Y., Etchevers, P., Greene, E., McClung, D., Nishimura, K., Satyawali, P., and Sokratov, S. A.: The international classification for seasonal snow on the ground, HPVII Technical Documents in Hydrology No. 83, IACS Contribution No. 1, UNESCO-IHP, Paris, 2009.

Frolov, A. D., and Macheret, Y. Y.: On dielectric properties of dry and wet snow. *Hydrol. Process.*, 13, 1755–1760, 1999.

565 Fujita, S., Shiraishi, M., and Mae, S.: Measure on the microwave dielectric constant of ice by the standing wave method, In: *Physics and Chemistry of Ice*, Hokkaido University Press Sapporo, 415-421, 1992.

Gergely, M., Schneebeli, M., and Roth, K.: First experiments to determine snow density from diffuse nearinfrared transmittance, *Cold Reg. Sci. Technol.*, 64, 81–86, <https://doi.org/10.1016/j.coldregions.2010.06.005>, 2010.

570 Hannula, H.-R., Lemmetyinen, J., Kontu, A., Derksen, C., and Pulliainen, J.: Spatial and temporal variation of bulk snow properties in northern boreal and tundra environments based on extensive field measurements, *Geosci. Instrum. Method. Data Syst.*, 5, 347–363, <https://doi.org/10.5194/gi-5-347-2016>, 2016.

575 Hao, J. S., Huang, F. R., Liu, Y., Amobichukwu, C. A., and Li, L.H.: Avalanche activity and characteristics of its triggering factors in the western Tianshan Mountains, China, *J. Mt. Sci.*, 15, 1394-1411, <https://doi.org/10.1007/s11629-018-4941-2>, 2008.

Harper, J. T. and Bradford, J. H.: Snow stratigraphy over a uniform depositional surface: spatial variability and measurement tools, *Cold Reg. Sci. Technol.*, 37, 289–298, [https://doi.org/10.1016/S0165-232X\(03\)00071-5](https://doi.org/10.1016/S0165-232X(03)00071-5), 2003.

580 Hawley, R. L., Brandt, O., Morris, E. M., Kohler, J., Shepherd, A. P., and Wingham, D. J.: Instruments and Methods: Techniques for measuring high-resolution firn density profiles: case study from Kongsvegen, Svalbard, *J. Glaciol.*, 54, 463–468, <https://doi.org/10.3189/002214308785837020>, 2008.

585 Huning, L. S. and AghaKouchak, A.: Mountain snowpack response to different levels of warming, *Proceedings of the National Academy of Sciences of the United States of America*, *Pro. Natl. Acad. Sci.*, 115, 10932–10937. <https://doi.org/10.1073/pnas.1805953115>, 2018.

ISO: Accuracy (trueness and precision) of measure methods and results - Part 1: General principles and definitions, 1994.

590 Jamieson, B. and Johnston, C. D.: Evaluation of the shear frame test for weak snowpack layers, *Ann. Glaciol.*, 32, 59-69, <https://doi.org/10.3189/172756401781819472>, 2001.

Jamieson, B., Zeidler, A., and Brown, C.: Explanation and limitations of study plot stability indices for forecasting dry snow slab avalanches in surrounding terrain, *Cold Reg. Sci. Technol.*, 50(1-3), 23-34. <https://doi.org/10.1016/j.coldregions.2007.02.010>, 2007.

595 Jonas, T., Marty, C., and Magnusson, J.: Estimating the snow water equivalent from snow depth measures in the Swiss Alps, *J. Hydrol.*, 378(1-2), 161–167, <https://doi.org/10.1016/j.jhydrol.2009.09.021>, 2009.

Kärkäs, E., Martma, T., and Sonninen, E.: Physical properties and stratigraphy of surface snow in western Dronning Maud Land, Antarctica. *Polar Res.*, 24, 55-67,

- 600 <https://doi.org/10.3402/polar.v24i1.6253>, 2005.
- Kaur, S., and Satyawali, P. K.: Estimation of snow density from SnowMicroPen measurements, *Cold Reg. Sci. Technol.*, 134, 1-10, <https://doi.org/10.1016/j.coldregions.2016.11.001>, 2017.
- Kinar, N., and Pomeroy, J. W.: Measure of the physical properties of the snowpack. *Rev. Geophys.*, 53, 481–544, <https://doi.org/10.1002/2015RG000481>, 2015.
- 605 Kovacs, A., Gow, A. J., and Morey, R. M.: The in-situ dielectric constant of polar firn revisited, *Cold Reg. Sci. Technol.*, 23(3), 245–256, 1995.
- Lehning, M., Bartelt, P., Brown, B., Fierz, C., and Satyawali, P. K.: A physical SNOWPACK model for the Swiss avalanche warning Part II. Snow microstructure, *Cold Reg. Sci. Technol.*, 35, 147–167, doi:10.1016/S0165-232X(02)00073-3, 2002.
- 610 Leppänen, L., Kontu, A., Hannula, H.-R., Sjöblom, H., and Pulliainen, J.: Sodankylä manual snow survey program, *Geosci. Instrum. Method. Data Syst.*, 5, 163–179, <https://doi.org/10.5194/gi-5-163-2016>, 2016.
- López-Moreno, J. I., Leppänen, L., Luks, B., Holko, L., Picard, G., Sanmiguel - Vallelado, A., Alonso - González, E., Finger, D. C., Arslan, A.N., Gillemot, K. and Sensoy, A.: Intercomparison of measurements of bulk snow density and water equivalent of snow cover with snow core samplers: instrumental bias and variability induced by observers, *Hydrol. Process.*, <https://doi.org/10.1002/hyp.13785>, 2020.
- 615 Lu, H., Wei, W. S., Liu, M. Z., Han, X., Li, M., and Hong, W.: Variations in seasonal snow surface energy exchange during a snowmelt period: an example from the Tianshan Mountains, China, *Meteorol Appl*, 23, 14-25, <https://doi.org/10.1002/met.15112016>.
- 620 Ma, W., and Hu R. J.: Relationship between the development of depth hoar and avalanche release in the Tian Shan mountains, China. *J. Glaciol.*, 36, <https://doi.org/10.3189/S0022143000005529>, 1990.
- Mellor, M., A review of basic snow mechanics, *IAHS-AISH Pub.*, 114, 251–291, 1975.
- Nakamura, T., Abe, O., Hashimoto, R., and Ohta, T.: A dynamic method to measure the shear strength of snow, *J. Glaciol.*, 56, 333-338, <https://doi.org/10.3189/002214310791968502>, 2010.
- 625 Okuyama, J., Narita, H., Hondoh, T., and Koerner, R. M.: Physical properties of the ice core from Penny Ice Cap, Baffin Island, Canada, and derived climatic records, *J. Geophys. Res.*, 108(B2), 2090. <https://doi.org/10.1029/2001JB001707>, 2003.
- Pielmeier, C. and Schneebeli, M.: Stratigraphy and changes in hardness of snow measured by hand, ramsonde and snow micro penetrometer: a comparison with planar sections, *Cold Reg. Sci. Technol.*, 37(3): 393-405, [https://doi.org/10.1016/S0165-232X\(03\)00079-X](https://doi.org/10.1016/S0165-232X(03)00079-X), 2003.
- 630 Proksch, M., Rutter, N., Fierz, C., and Schneebeli, M.: Intercomparison of snow density measures: bias, precision, and vertical resolution, *The Cryosphere*, 10(1), 371-384. <https://doi.org/10.5194/tc-10-371-2016>, 2016.
- 635 Rixen, C., Freppaz, M., Stoeckli, V., Huovinen, C., Huovinen, K., and Wipf, S.: Altered snow density and chemistry change soil nitrogen mineralization and plant growth, *Arct Antarct Alp Res.*, 40(3), 568–575. [https://doi.org/10.1657/1523-0430\(07-044\)\[RIXEN\]2.0.CO;2](https://doi.org/10.1657/1523-0430(07-044)[RIXEN]2.0.CO;2), 2008.
- Schneebeli, M., Coléou, C., Touvier, F., and Lesaffre, B.: Measure of density and wetness in snow using time-domain reflectometry, *Ann. Glaciol.*, 26, 69-72, <https://doi.org/10.3189/1998AoG26-1-69-72>, 1998.
- 640 Schweizer, J., Jamieson, J. B.: Snow cover properties for skier triggering of avalanches, *Cold Reg. Sci. Technol.*, 33 (2–3), 207–221, [https://doi.org/10.1016/S0165-232X\(01\)00039-8](https://doi.org/10.1016/S0165-232X(01)00039-8), 2001.
- Sihvola, A. and Tiuri, M.: Snow fork for field determination of the density and wetness profiles of a



snow pack, IEEE T. Geosci. Remote, GE-24, 717–721, 1996.

- 645 Skiles, M. K., Flanner, M., Cook, J. M., Dumont, M., and Painter, T. H.: Radiative forcing by light-absorbing particles in snow. *Nature Climate Change*, Nat. Clim. Change, 8, 864–971, <https://doi.org/10.1038/s41558-018-0296-5>, 2018.
- Sturm, M., and Holmgren, J.: Differences in compaction behavior of three climate classes of snow, *Ann. Glaciol.*, 26, 125–130, <https://doi.org/10.3189/1998AoG26-1-125-130>, 1998.
- 650 Sturm, M., Holmgren, J., and Perovich, D. K.: Winter snow cover on the sea ice of the Arctic Ocean at the Surface Heat Budget of the Arctic Ocean (SHEBA): temporal evolution and spatial variability, *J. Geophys. Res.*, 107(C10), 8047, <https://doi.org/10.1029/2000JC000400>, 2002.
- Sturm, M., Holmgren, J., König, Max, and Morris, K.: The thermal conductivity of seasonal snow, *The thermal conductivity of seasonal snow. J. Glaciol.*, 43(143), 26–41. <https://doi.org/10.3189/S0022143000002781>, 1997.
- 655 Sturm, M., Taras, B., Liston, G. E., Derksen, C., Jonas, T., and Lea, J.: Estimating snow water equivalent using snow depth data and climate classes, *J. Hydrometeorol.*, 11(6): 1380–1394. <https://doi.org/10.1175/2010JHM1202.1>, 2010.
- Sugiyama, S., Enomoto, H., Fujita, S., Fukui, K., Nakazawa, F., and Holmlund, P.: Dielectric permittivity of snow measured along the route traversed in the Japanese–Swedish Antarctic Expedition 2007/08, *Ann. Glaciol.*, 51, 9–15, <https://doi.org/10.3189/172756410791392745>, 2010.
- Takeuchi, Y., Nohguchi, Y., Kawashima, K., and Izumi, K.: Measurement of snow-hardness distribution, *Ann. Glaciol.*, 26, 27–30. <https://doi.org/10.3189/1998AoG26-1-27-30>, 1998.
- Techel, F., and Pielmeier, C.: Point observations of liquid water content in wet snow—investigating methodical, spatial and temporal aspects, *The Cryosphere*, 5, 405–418, <https://doi.org/10.5194/tc-5-405-2011>, 2011.
- 665 Tiuri, M., Sihvola, A., Nyfors, E., and Hallikainen, M.: The Complex Dielectric Constant of Snow at Microwave Frequencies, *IEEE J. Oceanic Eng.*, 9, 377–382, 1984.
- Toikka: Snow Fork – a portable instrument for measuring the properties of snow., Ins.toimisto Toikka Oy, Espoo, Finland, <http://www.toikkaoy.com/>, p. 2, 2009.
- 670 Wang, X. and Baker, I.: Observation of the microstructural evolution of snow under uniaxial compression using X-ray computed microtomography, *J. Geophys. Res.-Atmos.*, 118, 12371–12382, <https://doi.org/10.1002/2013JD020352>, 2013.
- Wilhelms, F.: Explaining the dielectric properties of firn as a density-and-conductivity mixed permittivity (DECOMP), *Geophys. Res. Lett.*, 32, L16501, <https://doi.org/10.1029/2005GL022808>, 2005.
- 675 Yamanoi, K., and Endo, Y.: Dependence of shear strength of snow cover on density and water content, *Seppyo, J. Jpn. Soc. Snow Ice*, 64, 443–451, 2002.
